# Supplementary material
Source: HighWire-hosted journal article supplement (https://cmajopen.ca/highwire/filestream/87875/field_highwire_adjunct_files/0/2021-0132-1-at.pdf)
Supplement: 2021-0132-1-at.pdf [file 2021-0132-1-at.pdf]

**Appendix Table 1. Variable checklist for each database**

| Database                                                                         | Variables                                             | Location                                                                        | Definition                                                                                                            |
|----------------------------------------------------------------------------------|-------------------------------------------------------|---------------------------------------------------------------------------------|-----------------------------------------------------------------------------------------------------------------------|
| National Ambulatory Care Reporting System (NACRS) <sup>1,2</sup> - Patient Level | Number of patients                                    | Table 1, Table 2, Table 3, Table 4, Table 5, Appendix Table 5, Appendix Table 6 | Count of patients                                                                                                     |
|                                                                                  | Number of ED visits per patient                       | Table 1, Table 2, Table 3, Appendix Table 5, Appendix Table 6                   | Count of ED visits individually                                                                                       |
|                                                                                  | Sex                                                   | Table 3, Table 4, Table 5, Appendix Table 5, Appendix Table 6                   | Original data                                                                                                         |
|                                                                                  | Age                                                   | Table 3, Appendix Table 5, Appendix Table 6                                     | Original data                                                                                                         |
|                                                                                  | Rural/urban                                           | Table 3, Table 4, Table 5, Appendix Table 5, Appendix Table 6                   | Derived from the truncated postal code. Rural residence had “0” in the second position of the truncated postal code.  |
|                                                                                  | Number of discharge diagnosis mental illness chapters | Appendix Table 5, Appendix Table 6                                              | Count of the ICD-10-CA ED diagnoses pertaining to mental health issues                                                |
|                                                                                  | Number of discharge diagnosis circulatory chapters    | Appendix Table 5, Appendix Table 6                                              | Count of the ICD-10-CA ED diagnoses pertaining circulatory issues                                                     |
|                                                                                  | Number of discharge diagnosis respiratory chapters    | Appendix Table 5, Appendix Table 6                                              | Count of the ICD-10-CA ED diagnoses pertaining to respiratory issues                                                  |
|                                                                                  | Number of discharge diagnosis digestive chapters      | Appendix Table 5, Appendix Table 6                                              | Count of the ICD-10-CA ED diagnoses pertaining to digestive issues                                                    |
|                                                                                  | Charlson Comorbidity Index                            | Table 4, Table 5, Appendix Table 5, Appendix Table 6                            | Derived from primary ED diagnosis. This index combines patients’ status on 17 medical comorbidities into a score with |

Appendix 1, as supplied by authors. Appendix to: Moe J, Wang E, McGregor MJ, et al. Subgroups of people who make frequent emergency department visits in Ontario and Alberta: a retrospective cohort study. *CMAJ Open* 2022. DOI:10.9778/cmajo.20210132. Copyright © 2022 The Author(s) or their employer(s).

To receive this resource in an accessible format, please contact us at [cmaigroup@cmai.ca](mailto:cmaigroup@cmai.ca).

|                                                                               |                                                       |                                                                                 |                                                                                                                                                                                                   |
|-------------------------------------------------------------------------------|-------------------------------------------------------|---------------------------------------------------------------------------------|---------------------------------------------------------------------------------------------------------------------------------------------------------------------------------------------------|
|                                                                               |                                                       |                                                                                 | predictive validity for mortality.                                                                                                                                                                |
|                                                                               | Number of discharge diagnosis chapters                | Table 4, Table 5, Appendix Table 5, Appendix Table 6                            | Count of the distinct ICD-10-CA ED diagnosis chapters                                                                                                                                             |
|                                                                               | Number of months in the year that patients visited ED | Table 4, Table 5, Appendix Table 5, Appendix Table 6                            | Count of the months in the year that patients visited ED                                                                                                                                          |
|                                                                               | Regularity index                                      | Table 4, Table 5, Appendix Table 5, Appendix Table 6                            | Calculated an ED visit regularity index to characterize spacing between patients' visits over the 365-day pre-index-visit period using the following equation:<br>$1/1+\text{variance of visits}$ |
|                                                                               |                                                       |                                                                                 |                                                                                                                                                                                                   |
| National Ambulatory Care Reporting System (NACRS) <sup>1,2</sup> -Visit Level | Number of ED visits                                   | Table 1, Table 2, Table 3, Table 4, Table 5, Appendix Table 5, Appendix Table 6 | Count of ED visits                                                                                                                                                                                |
|                                                                               | Arrive by ambulance                                   | Table 1, Table 2, Table 3                                                       | Original data                                                                                                                                                                                     |
|                                                                               | Triage level                                          | Table 1, Table 2, Table 3                                                       | Original data                                                                                                                                                                                     |
|                                                                               | Top 5 ICD-10-CA ED diagnosis chapters                 | Table 1, Table 2, Appendix Table 5, Appendix Table 6                            | Classified primary ED diagnosis into ICD-10-CA diagnosis chapter and selected top 5.                                                                                                              |
|                                                                               | Top 5 ICD-10-CA ED primary diagnosis                  | Table 4, Table 5, Appendix Table 5, Appendix Table 6                            | Top 5 primary ED diagnosis with ICD-10-CA code                                                                                                                                                    |
|                                                                               | Visit disposition                                     | Table 1, Table 2, Table 3, Table 4, Table 5, Appendix Table 5, Appendix Table 6 | Original data                                                                                                                                                                                     |
|                                                                               |                                                       |                                                                                 |                                                                                                                                                                                                   |
| Hospitalization Characteristics (DAD) <sup>3</sup>                            | Number of patients                                    | Table 3, Table 4, Table 5, Appendix Table 5, Appendix Table 6                   | Count of patients                                                                                                                                                                                 |

Appendix 1, as supplied by authors. Appendix to: Moe J, Wang E, McGregor MJ, et al. Subgroups of people who make frequent emergency department visits in Ontario and Alberta: a retrospective cohort study. *CMAJ Open* 2022. DOI:10.9778/cmajo.20210132. Copyright © 2022 The Author(s) or their employer(s).

To receive this resource in an accessible format, please contact us at [cmaigroup@cmaj.ca](mailto:cmaigroup@cmaj.ca).

|                                                                    |                                              |                                                                        |                                                                                                                                       |
|--------------------------------------------------------------------|----------------------------------------------|------------------------------------------------------------------------|---------------------------------------------------------------------------------------------------------------------------------------|
|                                                                    | Number of admissions                         | Table 1, Table 2, Appendix Table 5, Appendix Table 6                   | Count of admissions                                                                                                                   |
|                                                                    | Number of admissions per patient             | Table 1, Table 2, Appendix Table 5, Appendix Table 6                   | Count of admissions individually                                                                                                      |
|                                                                    | Median time admitted (days)                  | Appendix Table 5, Appendix Table 6                                     | Original data: the total number of days the patient was hospitalized.                                                                 |
|                                                                    | Top 5 ICD-10 diagnosis chapters 1 simplified | Table 1, Table 2, Table 4, Table 5, Appendix Table 5, Appendix Table 6 | Classified the most responsible diagnosis for the patient during hospitalization into ICD-10-CA diagnosis chapter and selected top 5. |
|                                                                    | ICD-10 main problem chapter                  | Table 3                                                                | responsible diagnosis for the patient during hospitalization into ICD-10-CA diagnosis chapter                                         |
|                                                                    | Alcohol-related diagnosis                    | Table 3, Table 4, Table 5, Appendix Table 5, Appendix Table 6          | Identified from the most responsible diagnosis for the patient during hospitalization based on standard in supplementary Table 1.     |
|                                                                    |                                              |                                                                        |                                                                                                                                       |
| Mental Health Hospitalization Characteristics (HMHDB) <sup>4</sup> | Number of patients                           | Table 3, Table 4, Table 5, Appendix Table 5, Appendix Table 6          | Count of patients                                                                                                                     |
|                                                                    | Number of mental health admissions           | Table 1, Table 2, Appendix Table 5, Appendix Table 6                   | Count of mental health admissions                                                                                                     |
|                                                                    | Data source                                  | Appendix Table 5, Appendix Table 6                                     | Original data: indicates the original data source for the record                                                                      |
|                                                                    | Homelessness                                 | Table 3, Appendix Table 5, Appendix Table 6                            | Original data: indicates whether a person was homeless on admission                                                                   |

Appendix 1, as supplied by authors. Appendix to: Moe J, Wang E, McGregor MJ, et al. Subgroups of people who make frequent emergency department visits in Ontario and Alberta: a retrospective cohort study. *CMAJ Open* 2022. DOI:10.9778/cmajo.20210132. Copyright © 2022 The Author(s) or their employer(s).

To receive this resource in an accessible format, please contact us at [cmaigroup@cmai.ca](mailto:cmaigroup@cmai.ca).

|                                                      |                                                |                                                                                      |                                                                                                     |
|------------------------------------------------------|------------------------------------------------|--------------------------------------------------------------------------------------|-----------------------------------------------------------------------------------------------------|
|                                                      | Age                                            | Appendix Table 5,<br>Appendix Table 6                                                | Original data                                                                                       |
|                                                      | Number of mental health admissions per patient | Table1, Table 2,<br>Appendix Table 5,<br>Appendix Table 6                            | Count of mental health admissions individually                                                      |
|                                                      | Involuntary admissions                         | Appendix Table 5,<br>Appendix Table 6                                                | Original data: indicates the legal status of the patient upon admission to hospital                 |
|                                                      | Length of stay at hospital (days)              | Appendix Table 5,<br>Appendix Table 6                                                | Original data: the total number of days the person was hospitalized.                                |
|                                                      | Diagnosis category                             | Table1, Table 2, Table 3, Table 4, Table 5,<br>Appendix Table 5,<br>Appendix Table 6 | Original data                                                                                       |
|                                                      | Discharge disposition                          | Appendix Table 5,<br>Appendix Table 6                                                | Original data: broad mental health category based on the most responsible separation diagnosis code |
|                                                      |                                                |                                                                                      |                                                                                                     |
| Continuing Care Reporting System (CCRS) <sup>5</sup> | Number of patients                             | Table 3                                                                              | Count of patients                                                                                   |
|                                                      |                                                |                                                                                      |                                                                                                     |
| Home Care Reporting System (HCRS) <sup>6</sup>       | Number of patients                             | Table 3                                                                              | Count of patients                                                                                   |

**Footnote:** Emergency department (ED), International Statistical Classification of Diseases and Related Health Problems (ICD-10-CA).

1. Canadian Institute for Health Information. National Ambulatory Care Reporting System Metadata (NACRS). Ottawa, ON. Available from: [www.cihi.ca/en/national-ambulatory-care-reporting-system-metadata-nacrs](http://www.cihi.ca/en/national-ambulatory-care-reporting-system-metadata-nacrs).

2. Canadian Institute for Health Information. Data Quality Documentation, National Ambulatory Care Reporting System Ottawa, ON. Available from: [www.cihi.ca/sites/default/files/document/nacrs-data-quality-current-year-information-2019-2020-en.pdf](http://www.cihi.ca/sites/default/files/document/nacrs-data-quality-current-year-information-2019-2020-en.pdf)

3. Canadian Institute for Health Information. Discharge Abstract Database Metadata (DAD). Ottawa, ON. Available from: [www.cihi.ca/en/discharge-abstract-database-metadata-dad](http://www.cihi.ca/en/discharge-abstract-database-metadata-dad)

Appendix 1, as supplied by authors. Appendix to: Moe J, Wang E, McGregor MJ, et al. Subgroups of people who make frequent emergency department visits in Ontario and Alberta: a retrospective cohort study. *CMAJ Open* 2022. DOI:10.9778/cmajo.20210132. Copyright © 2022 The Author(s) or their employer(s).

To receive this resource in an accessible format, please contact us at [cmaigroup@cmai.ca](mailto:cmaigroup@cmai.ca).

4. Canadian Institute for Health Information. Hospital Mental Health Database Metadata (HMHDB). Ottawa, ON. Available from: [www.cihi.ca/en/hospital-mental-health-database-metadata-hmhdb](http://www.cihi.ca/en/hospital-mental-health-database-metadata-hmhdb)

5. Canadian Institute for Health Information. Continuing Care Metadata. Ottawa, ON. Available from: [www.cihi.ca/en/continuing-care-metadata](http://www.cihi.ca/en/continuing-care-metadata)

6. Canadian Institute for Health Information. Home Care Reporting System Metadata. Ottawa, ON. Available from: [www.cihi.ca/en/home-care-reporting-system-metadata](http://www.cihi.ca/en/home-care-reporting-system-metadata)

Appendix 1, as supplied by authors. Appendix to: Moe J, Wang E, McGregor MJ, et al. Subgroups of people who make frequent emergency department visits in Ontario and Alberta: a retrospective cohort study. *CMAJ Open* 2022. DOI:10.9778/cmajo.20210132. Copyright © 2022 The Author(s) or their employer(s).

To receive this resource in an accessible format, please contact us at [cmaigroup@cmaj.ca](mailto:cmaigroup@cmaj.ca).

**Appendix Table 2. ICD-10-CA Alcohol-related Diagnostic Codes**

| ICD-10-CA Code | Description                                                                                         |
|----------------|-----------------------------------------------------------------------------------------------------|
| E244           | Alcohol-induced pseudo-Cushing's syndrome                                                           |
| E52            | Niacin deficiency [pellagra]                                                                        |
| F10.-          | Mental and behavioural disorders due to use of alcohol                                              |
| F100           | Mental and behavioural disorders due to use of alcohol, acute intoxication                          |
| F101           | Mental and behavioural disorders due to use of alcohol, harmful use                                 |
| F102           | Mental and behavioural disorders due to use of alcohol, dependence syndrome                         |
| F103           | Mental and behavioural disorders due to use of alcohol, withdrawal state                            |
| F104           | Mental and behavioural disorders due to use of alcohol, withdrawal state with delirium              |
| F105           | Mental and behavioural disorders due to use of alcohol, psychotic disorder                          |
| F106           | Mental and behavioural disorders due to use of alcohol, amnesic syndrome                            |
| F107           | Mental and behavioural disorders due to use of alcohol, residual and late-onset psychotic disorder  |
| F108           | Mental and behavioural disorders due to use of alcohol, other mental and behavioural disorders      |
| F109           | Mental and behavioural disorders due to use of alcohol, unspecified mental and behavioural disorder |
| G312           | Degeneration of nervous system due to alcohol                                                       |
| G621           | Alcoholic polyneuropathy                                                                            |
| G721           | Alcoholic myopathy                                                                                  |
| I426           | Alcoholic cardiomyopathy                                                                            |
| K292           | Alcoholic gastritis                                                                                 |
| K70.-          | Alcoholic liver disease                                                                             |
| K700           | Alcoholic fatty liver                                                                               |
| K701           | Alcoholic hepatitis                                                                                 |
| K702           | Alcoholic fibrosis and sclerosis of liver                                                           |
| K703           | Alcoholic cirrhosis of liver                                                                        |
| K704           | Alcoholic hepatic failure                                                                           |
| K709           | Alcoholic liver disease, unspecified                                                                |
| K852           | Alcohol-induced acute pancreatitis                                                                  |
| K860           | Alcohol-induced chronic pancreatitis                                                                |
| O354           | Maternal care for (suspected) damage to fetus from alcohol                                          |
| R780           | Finding of alcohol in blood                                                                         |
| T510           | Toxic effects of alcohol, Ethanol                                                                   |
| X65            | Intentional self-poisoning by and exposure to alcohol                                               |
| Y15            | Poisoning by and exposure to alcohol, undetermined intent                                           |
| Y90            | Evidence of alcohol involvement determined by blood alcohol level                                   |
| Y91            | Evidence of alcohol involvement determined by level of intoxication                                 |
| Z040           | Blood-alcohol and blood-drug test                                                                   |
| Z714           | Alcohol abuse counselling and surveillance                                                          |

Appendix 1, as supplied by authors. Appendix to: Moe J, Wang E, McGregor MJ, et al. Subgroups of people who make frequent emergency department visits in Ontario and Alberta: a retrospective cohort study. *CMAJ Open* 2022. DOI:10.9778/cmajo.20210132. Copyright © 2022 The Author(s) or their employer(s).

To receive this resource in an accessible format, please contact us at [cmaigroup@cmaj.ca](mailto:cmaigroup@cmaj.ca).

|      |             |
|------|-------------|
| Z721 | Alcohol use |
|------|-------------|

**Footnote:** International Statistical Classification of Diseases and Related Health Problems (ICD-10-CA).

Appendix 1, as supplied by authors. Appendix to: Moe J, Wang E, McGregor MJ, et al. Subgroups of people who make frequent emergency department visits in Ontario and Alberta: a retrospective cohort study. *CMAJ Open* 2022. DOI:10.9778/cmajo.20210132. Copyright © 2022 The Author(s) or their employer(s).

To receive this resource in an accessible format, please contact us at [cmaigroup@cmaj.ca](mailto:cmaigroup@cmaj.ca).

**Appendix Table 3. Pseudo-F Values Associated with Cluster Number Among People Who Make Frequent ED Visits in Ontario.**

| Clusters | 1       | 2        | 3       | 4       | 5       | 6       | 7       | 8       | 9       | 10      |
|----------|---------|----------|---------|---------|---------|---------|---------|---------|---------|---------|
| W        | 4509810 | 3846495  | 3396256 | 3048085 | 2828354 | 2631140 | 2435573 | 2292006 | 2155767 | 2050494 |
| Pseudo F | Inf     | 77769.91 | 73932.8 | 72089.6 | 67026.4 | 64400.5 | 64011.5 | 62339.1 | 61556.3 | 60098.3 |
|          |         |          | 4       |         | 2       | 9       | 4       | 4       | 8       | 9       |

Appendix 1, as supplied by authors. Appendix to: Moe J, Wang E, McGregor MJ, et al. Subgroups of people who make frequent emergency department visits in Ontario and Alberta: a retrospective cohort study. *CMAJ Open* 2022. DOI:10.9778/cmajo.20210132. Copyright © 2022 The Author(s) or their employer(s).

To receive this resource in an accessible format, please contact us at [cmaigroup@cmaj.ca](mailto:cmaigroup@cmaj.ca).



## Appendix Figure 1: Elbow Plot Associated with Cluster Number Among People Who Make Frequent ED Visits in Ontario.

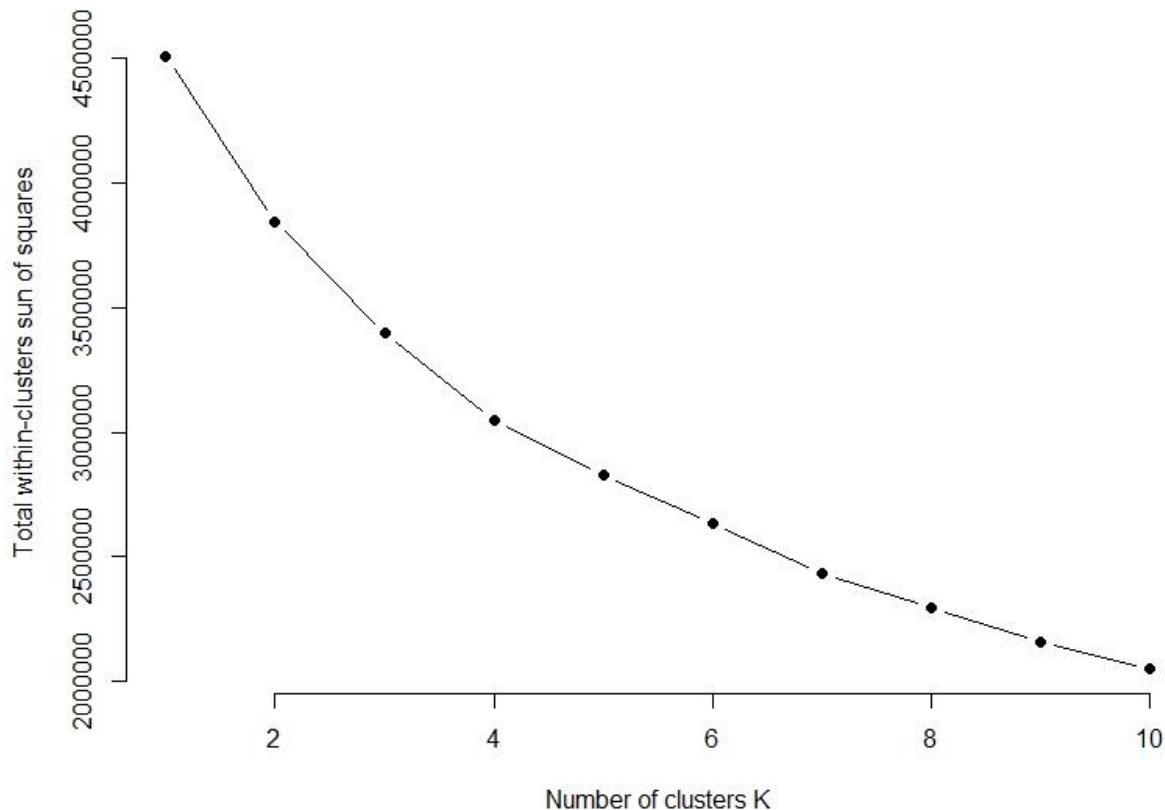

**Footnote:** We chose four subgroups based on optimization of the pseudo-F statistic value, which compares between-cluster to within-cluster sum-of-squares, a visible kink in the elbow plot (seen at both two and four subgroups), and real-world meaningfulness of generated subgroups. This is an accepted approach in the literature. We used the pseudo-F test and elbow plot as a guide. However, it is well-accepted in cluster analysis to include analyst input in addition to statistical testing to interpret meaningful groups. We considered our previous analysis of British Columbia data, which identified four clinically meaningful subgroups. When we ran our cluster algorithm using the current Ontario and Alberta data, we obtained clinically sensible groupings that were similar to our British Columbia analysis when we specified four subgroups. This produced a more descriptive output than organizing our data into two groupings. We also ran our clustering algorithm specifying five subgroups, and while gaining marginally in the pseudo-F value, organizing our data into five subgroups did not add anything meaningful or actionable from a clinical perspective.

Appendix 1, as supplied by authors. Appendix to: Moe J, Wang E, McGregor MJ, et al. Subgroups of people who make frequent emergency department visits in Ontario and Alberta: a retrospective cohort study. *CMAJ Open* 2022. DOI:10.9778/cmajo.20210132. Copyright © 2022 The Author(s) or their employer(s).

To receive this resource in an accessible format, please contact us at [cmaigroup@cmaj.ca](mailto:cmaigroup@cmaj.ca).

**Appendix Figure 2: Graphical Representation of Subgroups of People Who Make Frequent ED Visits in Ontario.**

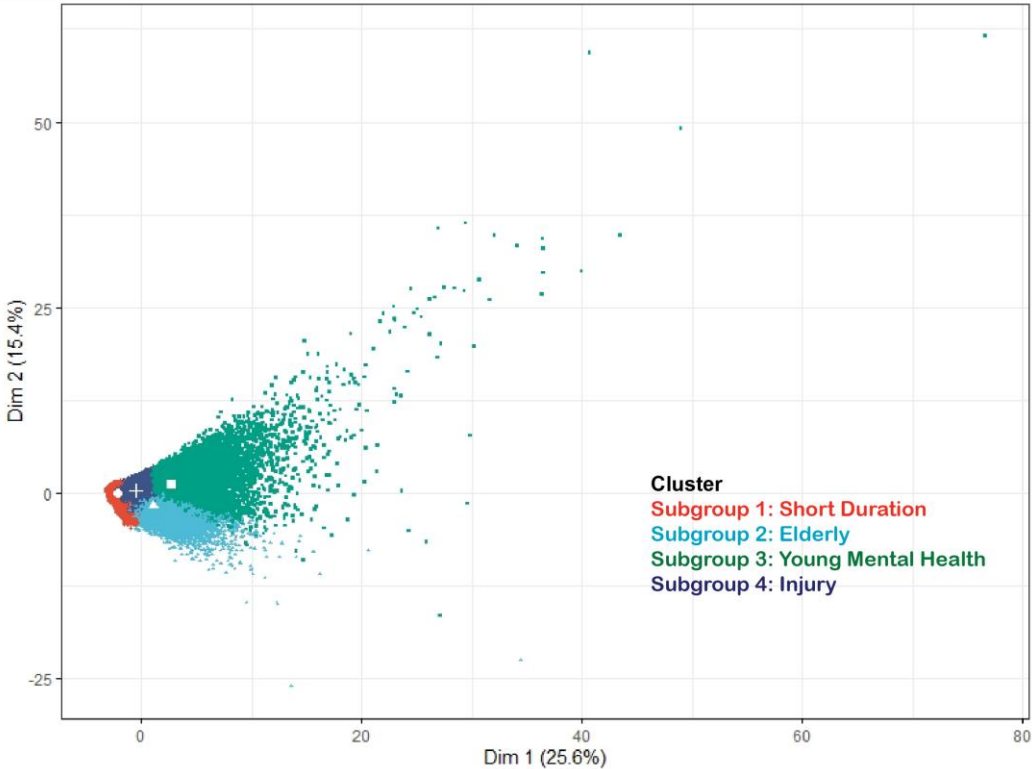

Appendix 1, as supplied by authors. Appendix to: Moe J, Wang E, McGregor MJ, et al. Subgroups of people who make frequent emergency department visits in Ontario and Alberta: a retrospective cohort study. *CMAJ Open* 2022. DOI:10.9778/cmajo.20210132. Copyright © 2022 The Author(s) or their employer(s).

To receive this resource in an accessible format, please contact us at [cmaigroup@cmaaj.ca](mailto:cmaigroup@cmaaj.ca).

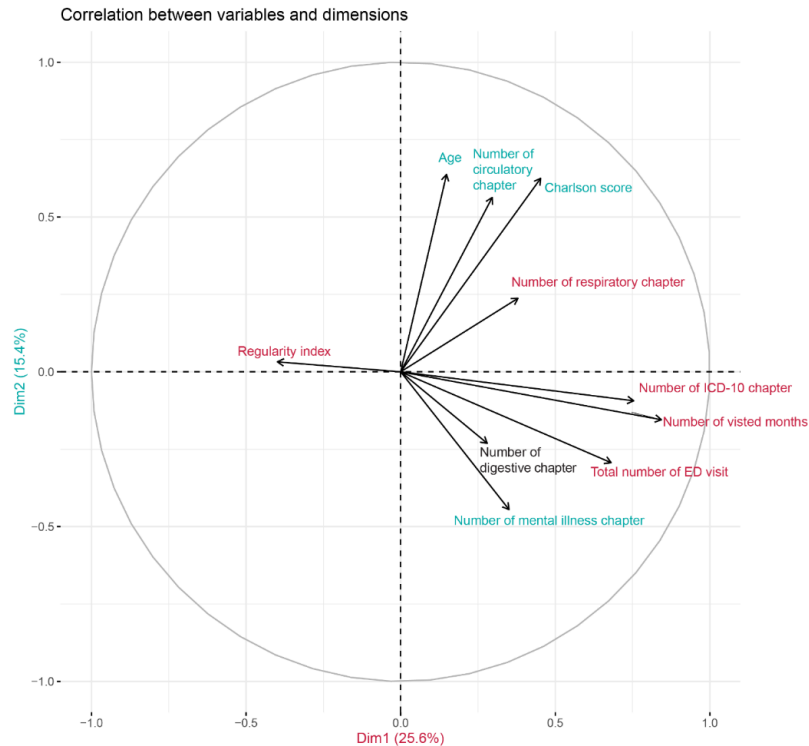

Footnote: white markers indicated the cluster mean for each group.

We were interested in a graphical representation of our subgroups, but doing so requires a reduction of the dimensionality of the data so that it can be represented on a graph. One approach to this is to apply a principal components-type analysis after clustering, and then plotting the most important variables vs. the second most important (these are Dim1 and Dim2). Supplementary Figure 2 showed clusters of samples based on their similarity. Dimension 1 accounted for 25.6% of the information. Dimension 2 accounted for 15.4% of the information. The variation for Subgroups 2 and 3 was higher than for Subgroups 1 and 4.

The plot above suggests that number of ICD-10-CA ED discharge diagnoses pertaining to respiratory, number of distinct ICD-10-CA diagnostic chapters, number of months that the patient visited an ED, and ED visit number had strong positive effect on Dimension 1. Regularity index had a strong negative effect on Dimension 1. Age at index, Charlson comorbidity score, and number of ICD-10-CA ED discharge diagnoses pertaining to circulatory concerns had a strong positive effect on Dimension 2. Number of ICD-10-CA ED discharge diagnoses pertaining to mental health had a strong negative effect on Dimension 2.

Appendix 1, as supplied by authors. Appendix to: Moe J, Wang E, McGregor MJ, et al. Subgroups of people who make frequent emergency department visits in Ontario and Alberta: a retrospective cohort study. *CMAJ Open* 2022. DOI:10.9778/cmajo.20210132. Copyright © 2022 The Author(s) or their employer(s).

To receive this resource in an accessible format, please contact us at [cmaigroup@cmaj.ca](mailto:cmaigroup@cmaj.ca).

### Appendix Figure 3: Distribution Among Clustering Variables for People Who Make Frequent ED Visits in Ontario

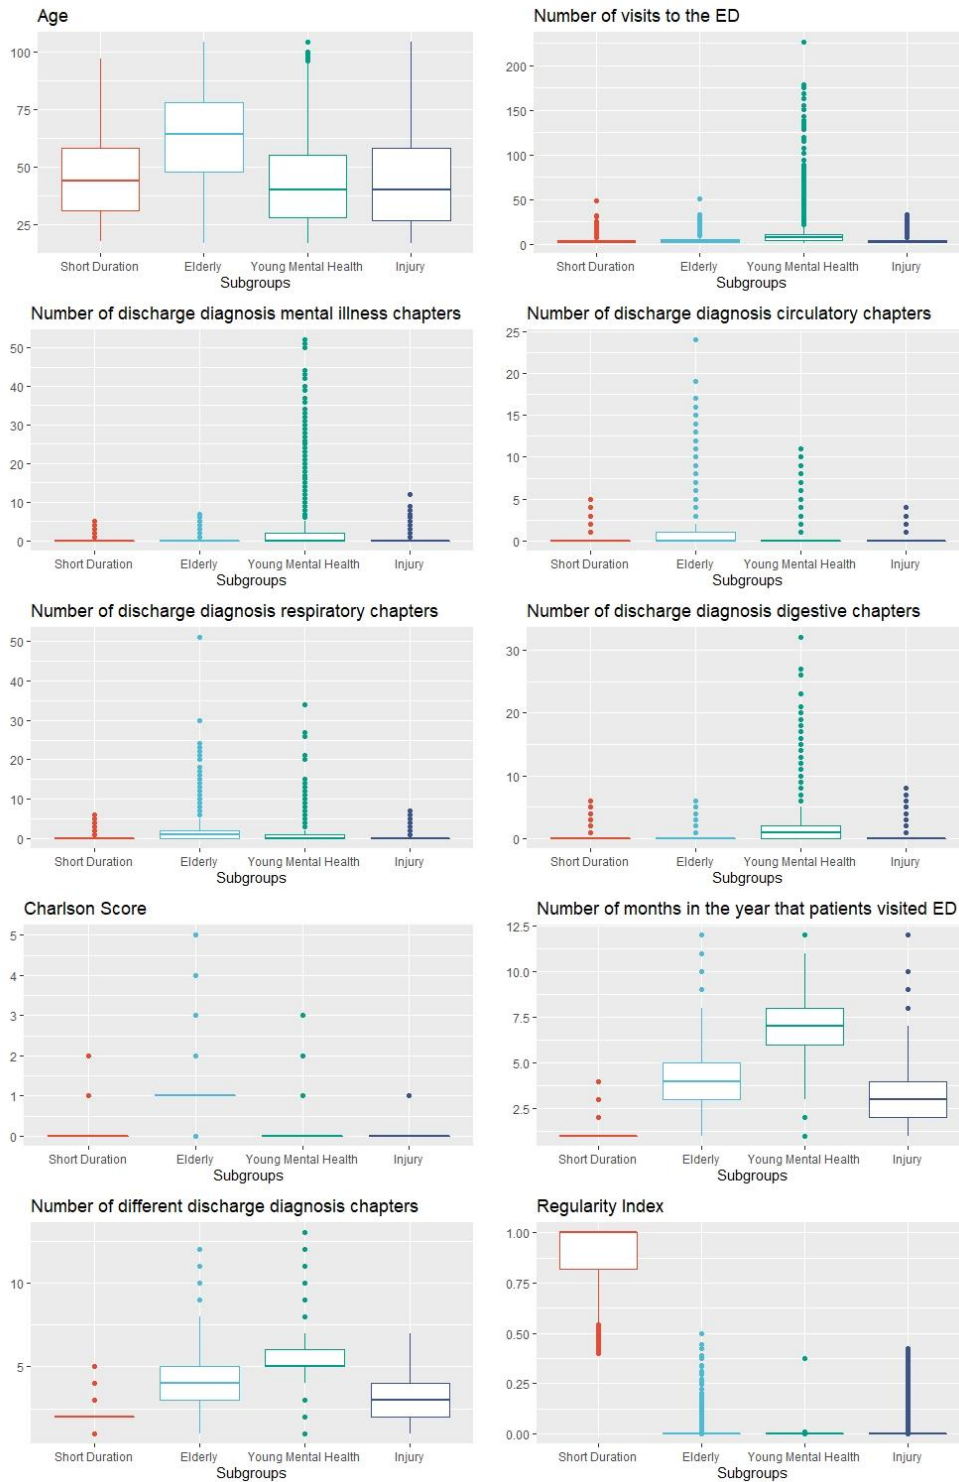

Appendix 1, as supplied by authors. Appendix to: Moe J, Wang E, McGregor MJ, et al. Subgroups of people who make frequent emergency department visits in Ontario and Alberta: a retrospective cohort study. *CMAJ Open* 2022. DOI:10.9778/cmajo.20210132. Copyright © 2022 The Author(s) or their employer(s).

To receive this resource in an accessible format, please contact us at [cmajgroup@cmaj.ca](mailto:cmajgroup@cmaj.ca).

**Appendix Table 4. Pseudo-F Values Associated with Cluster Number Among People Who Make Frequent ED Visits in Alberta.**

| Clusters | 1       | 2        | 3       | 4       | 5       | 6       | 7       | 8       | 9       | 10      |
|----------|---------|----------|---------|---------|---------|---------|---------|---------|---------|---------|
| W        | 1036250 | 888931.5 | 785195. | 705481. | 652290. | 603873. | 560312. | 523294. | 491721. | 462621. |
| Pseudo F | Inf     | 17173.12 | 16565.9 | 16194.5 | 15248.6 | 14838.4 | 14669.2 | 14510.0 | 14343.0 | 14275.4 |

Appendix 1, as supplied by authors. Appendix to: Moe J, Wang E, McGregor MJ, et al. Subgroups of people who make frequent emergency department visits in Ontario and Alberta: a retrospective cohort study. *CMAJ Open* 2022. DOI:10.9778/cmajo.20210132. Copyright © 2022 The Author(s) or their employer(s).

To receive this resource in an accessible format, please contact us at [cmaigroup@cmaj.ca](mailto:cmaigroup@cmaj.ca).

**Appendix Figure 4: Elbow Plot Associated with Cluster Number Among People Who Make Frequent ED Visits in Alberta.**

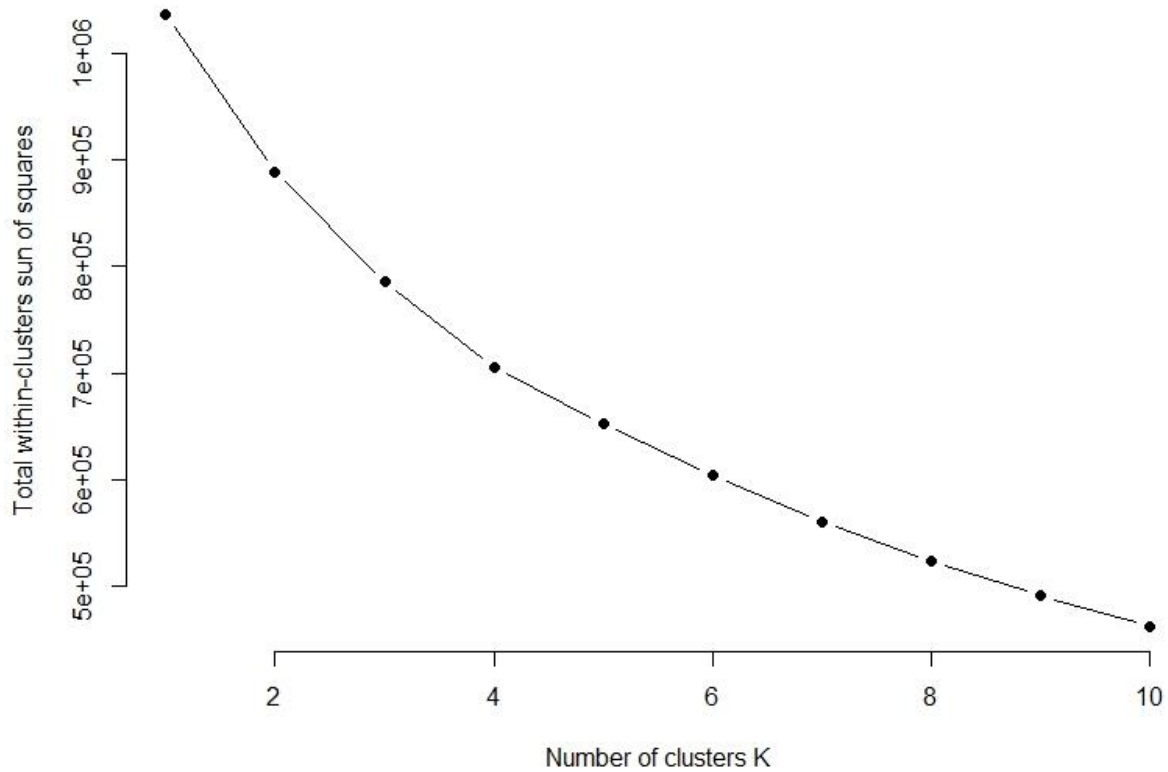

Appendix 1, as supplied by authors. Appendix to: Moe J, Wang E, McGregor MJ, et al. Subgroups of people who make frequent emergency department visits in Ontario and Alberta: a retrospective cohort study. *CMAJ Open* 2022. DOI:10.9778/cmajo.20210132. Copyright © 2022 The Author(s) or their employer(s).

To receive this resource in an accessible format, please contact us at [cmaigroup@cmaj.ca](mailto:cmaigroup@cmaj.ca).

## Appendix Figure 5: Graphical Representation of Subgroups of People Who Make Frequent ED Visits in Alberta.

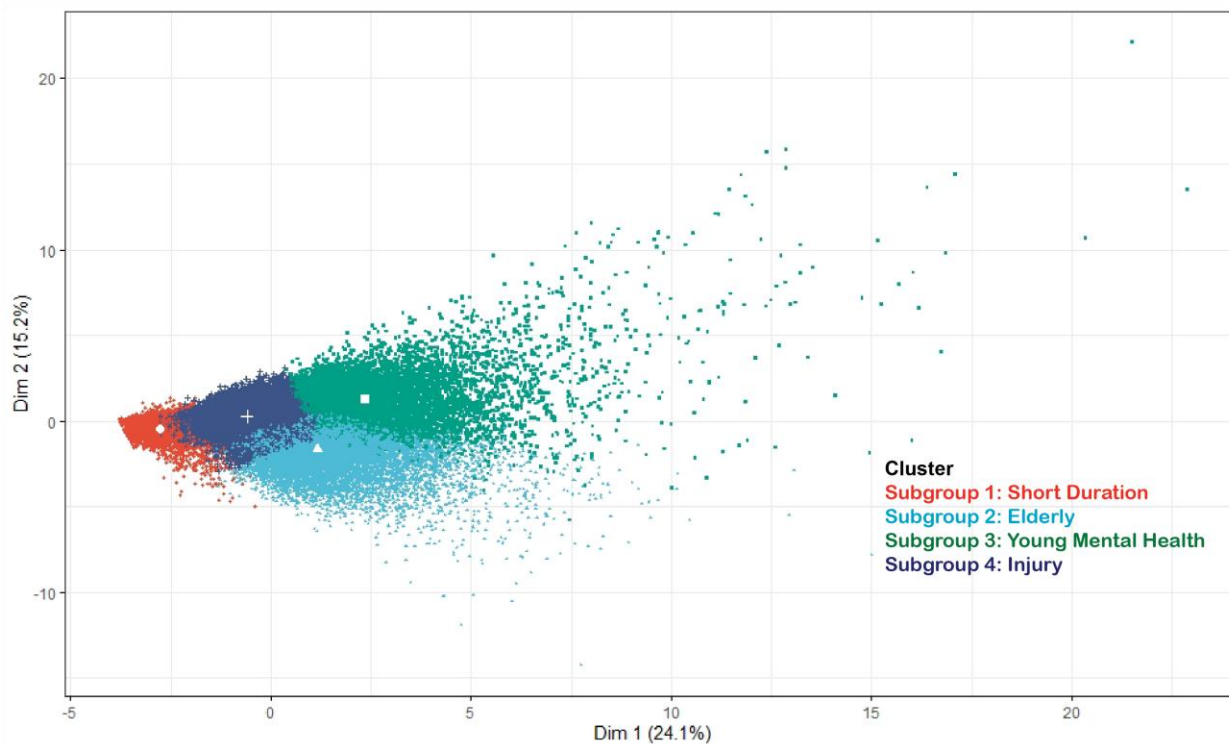

Appendix 1, as supplied by authors. Appendix to: Moe J, Wang E, McGregor MJ, et al. Subgroups of people who make frequent emergency department visits in Ontario and Alberta: a retrospective cohort study. *CMAJ Open* 2022. DOI:10.9778/cmajo.20210132. Copyright © 2022 The Author(s) or their employer(s).

To receive this resource in an accessible format, please contact us at [cmaigroup@cmaj.ca](mailto:cmaigroup@cmaj.ca).

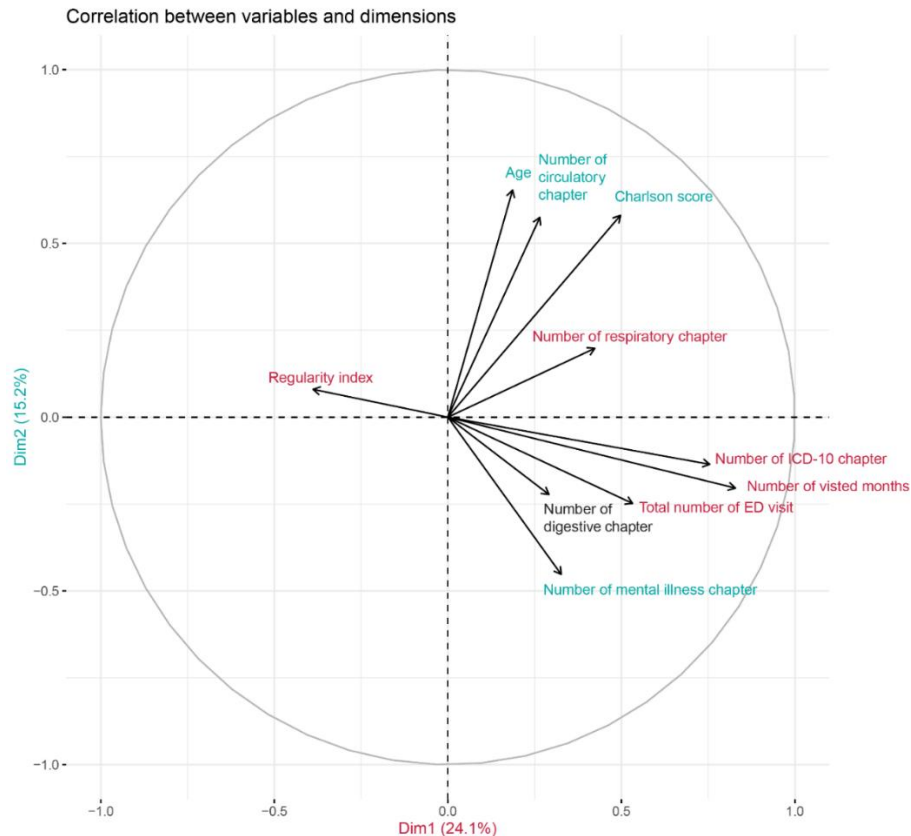

**Footnote:** white markers indicated the cluster mean for each group.

We were interested in a graphical representation of our subgroups, but doing so requires a reduction of the dimensionality of the data so that it can be represented on a graph. One approach to this is to apply a principal components-type analysis after clustering, and then plotting the most important variables vs. the second most important (these are Dim1 and Dim2). Supplementary Figure 5 showed clusters of samples based on their similarity. Dimension 1 (Dim 1) accounted for 24.1% of the information. Dimension 2 (Dim 2) accounted for 15.2% of the information. The variation within Subgroups 2 and 3 was higher than for Subgroups 1 and 4.

The plot above suggests that number of ICD-10-CA ED discharge diagnoses pertaining to respiratory, number of distinct ICD-10-CA diagnostic chapters, number of months that the patient visited an ED, and ED visit number had a strong positive effect on Dimension 1. Regularity index had a strong negative effect on Dimension 1. Age at index, Charlson comorbidity score, and number of ICD-10-CA ED discharge diagnoses pertaining to circulatory concerns had strong positive effect on Dimension 2. Number of ICD-10-CA ED discharge diagnoses pertaining to mental health had strong negative effect on Dimension 2.

Appendix 1, as supplied by authors. Appendix to: Moe J, Wang E, McGregor MJ, et al. Subgroups of people who make frequent emergency department visits in Ontario and Alberta: a retrospective cohort study. *CMAJ Open* 2022. DOI:10.9778/cmajo.20210132. Copyright © 2022 The Author(s) or their employer(s).

To receive this resource in an accessible format, please contact us at [cmaigroup@cmaj.ca](mailto:cmaigroup@cmaj.ca).



## Appendix Figure 6: Distribution Among Clustering Variables for People Who Make Frequent ED Visits in Alberta

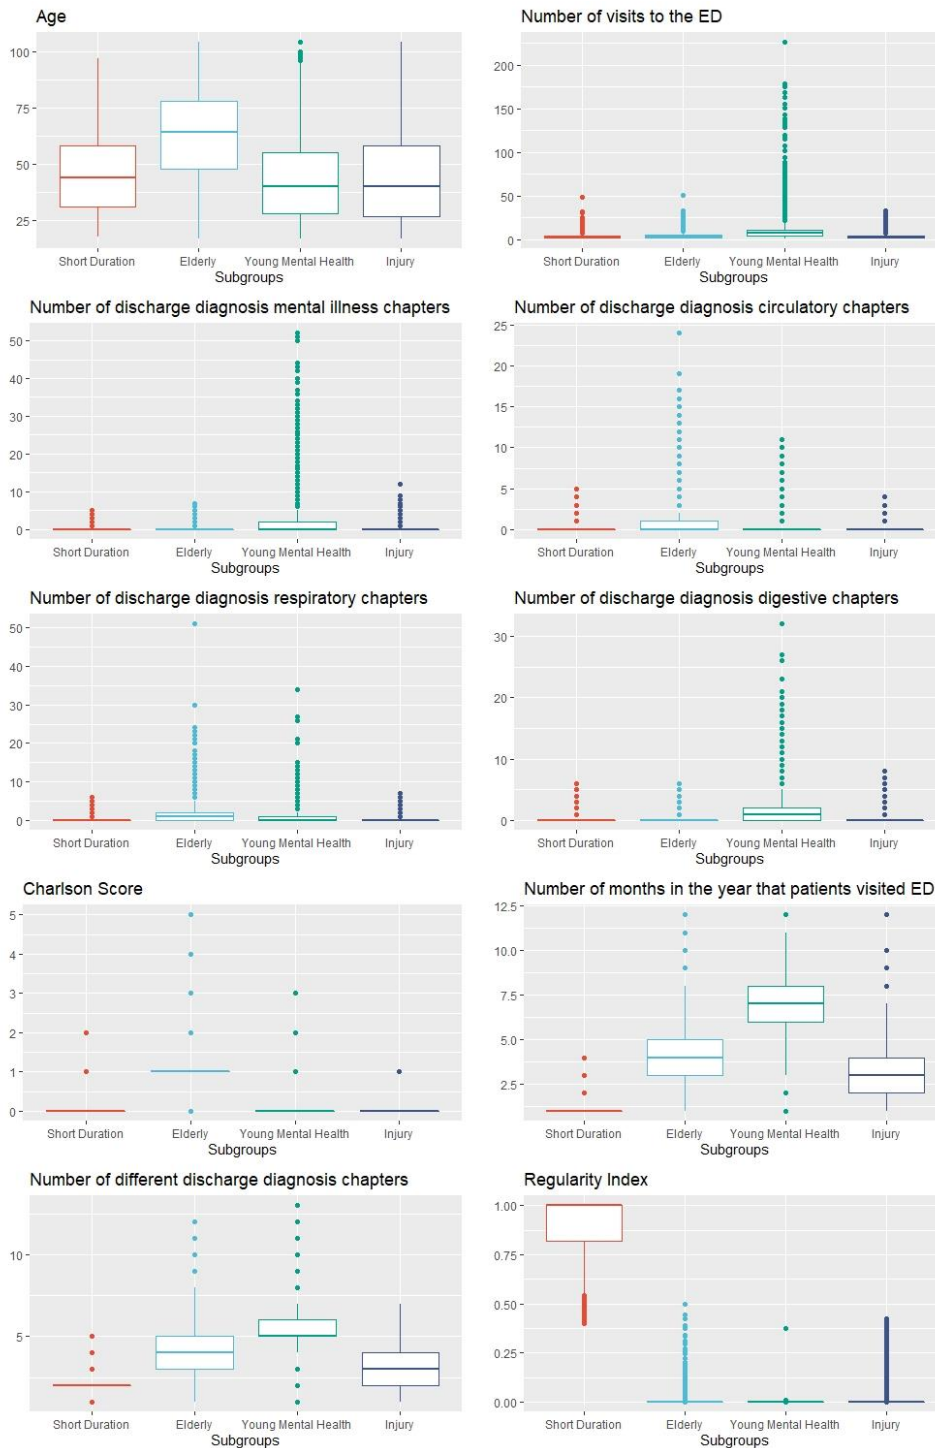

Appendix 1, as supplied by authors. Appendix to: Moe J, Wang E, McGregor MJ, et al. Subgroups of people who make frequent emergency department visits in Ontario and Alberta: a retrospective cohort study. *CMAJ Open* 2022. DOI:10.9778/cmajo.20210132. Copyright © 2022 The Author(s) or their employer(s).

To receive this resource in an accessible format, please contact us at [cmajgroup@cmaj.ca](mailto:cmajgroup@cmaj.ca).

**Appendix Table 5: Demographic and Healthcare Utilization Characteristics of People Who Make Frequent ED Visits in Ontario (Detailed Diagnostic Codes).**

| <b>Characteristics</b>                                                                   | <b>April 1<sup>st</sup> 2011-<br/>March 31<sup>st</sup> 2012</b> | <b>April 1<sup>st</sup> 2012-<br/>March 31<sup>st</sup> 2013</b> | <b>April 1<sup>st</sup> 2013-<br/>March 31<sup>st</sup> 2014</b> | <b>April 1<sup>st</sup> 2014-<br/>March 31<sup>st</sup> 2015</b> | <b>April 1<sup>st</sup> 2015-<br/>March 31<sup>st</sup> 2016</b> |
|------------------------------------------------------------------------------------------|------------------------------------------------------------------|------------------------------------------------------------------|------------------------------------------------------------------|------------------------------------------------------------------|------------------------------------------------------------------|
| <i>ED Visit Characteristics (NACRS)</i>                                                  |                                                                  |                                                                  |                                                                  |                                                                  |                                                                  |
| <b>Number of patients</b>                                                                | <b>435,334</b>                                                   | <b>446,954</b>                                                   | <b>451,568</b>                                                   | <b>465,949</b>                                                   | <b>477,647</b>                                                   |
| <b>Number of ED visits</b>                                                               | <b>2,004,975</b>                                                 | <b>2,053,609</b>                                                 | <b>2,079,281</b>                                                 | <b>2,149,965</b>                                                 | <b>2,213,161</b>                                                 |
| <b>Top 5, ICD-10 main problem chapter, n (%)</b>                                         |                                                                  |                                                                  |                                                                  |                                                                  |                                                                  |
| Diseases of the respiratory system (X)                                                   | 162,000 (8.1)                                                    | 170,897 (8.3)                                                    | 160,762 (7.7)                                                    | 180,688 (8.4)                                                    | 178,433 (8.1)                                                    |
| Diseases of the musculoskeletal system and connective tissue (XIII)                      | 136,297 (6.8)                                                    | 137,722 (6.7)                                                    | 140,076 (6.7)                                                    | 146,490 (6.8)                                                    | 154,688 (7.0)                                                    |
| Symptoms, signs and abnormal clinical and laboratory findings (XVIII)                    | 412,928 (20.6)                                                   | 427,536 (20.8)                                                   | 442,744 (21.3)                                                   | 458,415 (21.3)                                                   | 473,430 (21.4)                                                   |
| Injury, poisoning and certain other consequences of external causes (XIX)                | 285,123 (14.2)                                                   | 294,076 (14.3)                                                   | 300,560 (14.5)                                                   | 305,651 (14.2)                                                   | 320,186 (14.5)                                                   |
| Factors influencing health status and contact with health services (XXI)                 | 215,204 (10.7)                                                   | 212,930 (10.4)                                                   | 210,348 (10.1)                                                   | 205,890 (9.6)                                                    | 202,791 (9.2)                                                    |
| <i>Hospital Admission Characteristics (DAD)</i>                                          |                                                                  |                                                                  |                                                                  |                                                                  |                                                                  |
| <b>Number of admissions</b>                                                              | <b>255,202</b>                                                   | <b>268,573</b>                                                   | <b>276,307</b>                                                   | <b>284,787</b>                                                   | <b>292,411</b>                                                   |
| <b>Top 5 ICD-10 diagnosis chapters 1 simplified, n (%)</b>                               |                                                                  |                                                                  |                                                                  |                                                                  |                                                                  |
| Diseases of the circulatory system (IX)                                                  | 45,573 (17.9)                                                    | 46,974 (17.5)                                                    | 48,260 (17.5)                                                    | 49,267 (17.3)                                                    | 50,029 (17.1)                                                    |
| Diseases of the respiratory system (X)                                                   | 29,491 (11.6)                                                    | 32,452 (12.1)                                                    | 32,177 (11.6)                                                    | 36,479 (12.8)                                                    | 35,749 (12.2)                                                    |
| Diseases of the digestive system (XI)                                                    | 36,263 (14.2)                                                    | 37,876 (14.1)                                                    | 39,235 (14.2)                                                    | 38,983 (13.7)                                                    | 41,150 (14.1)                                                    |
| Symptoms and abnormal clinical and laboratory findings, not otherwise classified (XVIII) | 26,679 (10.5)                                                    | 27,441 (10.2)                                                    | 27,767 (10.0)                                                    | 27,771 (9.8)                                                     | 27,636 (9.5)                                                     |

Appendix 1, as supplied by authors. Appendix to: Moe J, Wang E, McGregor MJ, et al. Subgroups of people who make frequent emergency department visits in Ontario and Alberta: a retrospective cohort study. *CMAJ Open* 2022. DOI:10.9778/cmajo.20210132. Copyright © 2022 The Author(s) or their employer(s).

To receive this resource in an accessible format, please contact us at [cmaigroup@cmaj.ca](mailto:cmaigroup@cmaj.ca).

|                                                                           |              |              |              |              |              |
|---------------------------------------------------------------------------|--------------|--------------|--------------|--------------|--------------|
| Injury, poisoning and certain other consequences of external causes (XIX) | 24,054 (9.4) | 25,134 (9.4) | 26,302 (9.5) | 26,175 (9.2) | 27,506 (9.4) |
|---------------------------------------------------------------------------|--------------|--------------|--------------|--------------|--------------|

**Footnote:** \* Emergency department (ED), National Ambulatory Care Reporting System metadata (NACRS), International Statistical Classification of Diseases and Related Health Problems (ICD-10-CA), Discharge Abstract Database metadata (DAD).

Appendix 1, as supplied by authors. Appendix to: Moe J, Wang E, McGregor MJ, et al. Subgroups of people who make frequent emergency department visits in Ontario and Alberta: a retrospective cohort study. *CMAJ Open* 2022. DOI:10.9778/cmajo.20210132. Copyright © 2022 The Author(s) or their employer(s).

To receive this resource in an accessible format, please contact us at [cmaigroup@cmaj.ca](mailto:cmaigroup@cmaj.ca).

**Appendix Table 6: Demographic and Healthcare Utilization Characteristics of People Who Make Frequent ED Visits in Alberta (Detailed Diagnostic Codes).**

| Characteristics                                  | April 1 <sup>st</sup> 2011-<br>March 31 <sup>st</sup> 2012                                   | April 1 <sup>st</sup> 2012-<br>March 31 <sup>st</sup> 2013                                   | April 1 <sup>st</sup> 2013-<br>March 31 <sup>st</sup> 2014                                   | April 1 <sup>st</sup> 2014-<br>March 31 <sup>st</sup> 2015                                   | April 1 <sup>st</sup> 2015-<br>March 31 <sup>st</sup> 2016                                   |
|--------------------------------------------------|----------------------------------------------------------------------------------------------|----------------------------------------------------------------------------------------------|----------------------------------------------------------------------------------------------|----------------------------------------------------------------------------------------------|----------------------------------------------------------------------------------------------|
| <i>ED Visit Characteristics (NACRS)</i>          |                                                                                              |                                                                                              |                                                                                              |                                                                                              |                                                                                              |
| <b>Number of patients</b>                        | <b>98,840</b>                                                                                | <b>102,781</b>                                                                               | <b>103,711</b>                                                                               | <b>105,047</b>                                                                               | <b>102,027</b>                                                                               |
| <b>Number of ED visits</b>                       | <b>680,740</b>                                                                               | <b>699,962</b>                                                                               | <b>700,347</b>                                                                               | <b>704,256</b>                                                                               | <b>690,330</b>                                                                               |
| <b>Top 5, ICD-10 main problem chapter, n (%)</b> |                                                                                              |                                                                                              |                                                                                              |                                                                                              |                                                                                              |
| 1                                                | Factors influencing health status and contract with health services (XXI):<br>176,635 (25.9) | Factors influencing health status and contract with health services (XXI):<br>174,778 (25.0) | Factors influencing health status and contract with health services (XXI):<br>170,621 (24.4) | Factors influencing health status and contract with health services (XXI):<br>162,792 (23.1) | Factors influencing health status and contract with health services (XXI):<br>155,595 (22.5) |
| 2                                                | Symptoms, signs and abnormal clinical and laboratory findings (XVIII):<br>97,120 (14.3)      | Symptoms, signs and abnormal clinical and laboratory findings (XVIII):<br>100,856 (14.4)     | Symptoms, signs and abnormal clinical and laboratory findings (XVIII):<br>104,234 (14.9)     | Symptoms, signs and abnormal clinical and laboratory findings (XVIII):<br>108,528 (15.4)     | Symptoms, signs and abnormal clinical and laboratory findings (XVIII):<br>109,645 (15.9)     |
| 3                                                | Injury, poisoning and certain other consequences of external causes (XIX):<br>83,836 (12.3)  | Injury, poisoning and certain other consequences of external causes (XIX):<br>88,125 (12.6)  | Injury, poisoning and certain other consequences of external causes (XIX):<br>89,318 (12.8)  | Injury, poisoning and certain other consequences of external causes (XIX):<br>90,696 (12.9)  | Injury, poisoning and certain other consequences of external causes (XIX):<br>88,772 (12.9)  |
| 4                                                | Diseases of the respiratory system (X):<br>52,425 (7.7)                                      | Diseases of the respiratory system (X):<br>55,897 (8.0)                                      | Diseases of the respiratory system (X):<br>53,191 (7.6)                                      | Diseases of the respiratory system (X):<br>54,796 (7.8)                                      | Diseases of the respiratory system (X):<br>50,195 (7.3)                                      |
| 5                                                | Diseases of the musculoskeletal system and connective tissue (XIII):<br>39,632 (5.8)         | Diseases of the musculoskeletal system and connective tissue (XIII):<br>40,971 (5.9)         | Diseases of the musculoskeletal system and connective tissue (XIII):                         | Diseases of the digestive system (XI):<br>40,888 (5.8)                                       | Mental and behavioral disorders (V):<br>40,297 (5.8)                                         |

Appendix 1, as supplied by authors. Appendix to: Moe J, Wang E, McGregor MJ, et al. Subgroups of people who make frequent emergency department visits in Ontario and Alberta: a retrospective cohort study. *CMAJ Open* 2022. DOI:10.9778/cmajo.20210132. Copyright © 2022 The Author(s) or their employer(s).

To receive this resource in an accessible format, please contact us at [cmaigroup@cmaj.ca](mailto:cmaigroup@cmaj.ca).

41,019 (5.9)

| <i>Hospital Admission Characteristics (DAD)</i>                           |               |               |               |               |               |
|---------------------------------------------------------------------------|---------------|---------------|---------------|---------------|---------------|
| <b>Number of admissions</b>                                               | <b>66,843</b> | <b>70,069</b> | <b>72,127</b> | <b>73,466</b> | <b>75,014</b> |
| <b>Top 5 ICD-10 diagnosis chapters 1 simplified, n (%)</b>                |               |               |               |               |               |
| Mental and behavioral disorders (V)                                       | 6,736 (10.1)  | 7,244 (10.3)  | 7,824 (10.8)  | 8,143 (11.1)  | 8,608 (11.5)  |
| Diseases of the circulatory system (IX)                                   | 8,328 (12.5)  | 8,734 (12.5)  | 8,865 (12.3)  | 9,319 (12.7)  | 9,415 (12.6)  |
| Diseases of the respiratory system (X)                                    | 7,196 (10.8)  | 7,906 (11.3)  | 7,957 (11.0)  | 8,778 (11.9)  | 8,679 (11.6)  |
| Diseases of the digestive system (XI)                                     | 8,945 (13.4)  | 9,186 (13.1)  | 9,534 (13.2)  | 9,828 (13.4)  | 9,910 (13.2)  |
| Injury, poisoning and certain other consequences of external causes (XIX) | 6,966 (10.4)  | 7,310 (10.4)  | 7,556 (10.5)  | 7,823 (10.6)  | 7,904 (10.5)  |

**Footnote:** \* Emergency department (ED), National Ambulatory Care Reporting System metadata (NACRS), International Statistical Classification of Diseases and Related Health Problems (ICD-10-CA), Discharge Abstract Database metadata (DAD).

Appendix 1, as supplied by authors. Appendix to: Moe J, Wang E, McGregor MJ, et al. Subgroups of people who make frequent emergency department visits in Ontario and Alberta: a retrospective cohort study. *CMAJ Open* 2022. DOI:10.9778/cmajo.20210132. Copyright © 2022 The Author(s) or their employer(s).

To receive this resource in an accessible format, please contact us at [cmaigroup@cmaj.ca](mailto:cmaigroup@cmaj.ca).

**Appendix Table 7: Patient and Healthcare Utilization Characteristics of People Who Make Frequent ED Visits and Controls (April 1<sup>st</sup>, 2015 to March 31<sup>st</sup>, 2016) by Province (Detailed Diagnostic Codes).**

|                                                                                          | <b>People Who Make Frequent ED Visits in Ontario (N=477,647)</b> | <b>Control Cohort in Ontario (N=1,711,848)</b> | <b>People Who Make Frequent ED Visits in Alberta (N=102,027)</b> | <b>Control Cohort in Alberta (N=404,111)</b> |
|------------------------------------------------------------------------------------------|------------------------------------------------------------------|------------------------------------------------|------------------------------------------------------------------|----------------------------------------------|
| <i>Hospitalization Characteristics (DAD)</i>                                             |                                                                  |                                                |                                                                  |                                              |
| <b>Number of patients with at least one admission, n (%)</b>                             | <b>157,965 (33.1)</b>                                            | <b>186,498 (10.9)</b>                          | <b>38,464 (37.7)</b>                                             | <b>50,348 (12.5)</b>                         |
| <b>Number of admissions</b>                                                              | <b>292,411</b>                                                   | <b>211,916</b>                                 | <b>75,014</b>                                                    | <b>59,728</b>                                |
| <b>ICD-10 main problem chapter among admissions, n (%)</b>                               |                                                                  |                                                |                                                                  |                                              |
| Certain infectious and parasitic diseases (I)                                            | 13,966 (4.8)                                                     | 8,194 (3.9)                                    | 2,624 (3.5)                                                      | 1,738 (2.9)                                  |
| Neoplasms and diseases of the blood (II and III)                                         | 18,315 (6.3)                                                     | 11,092 (5.2)                                   | 3,439 (4.6)                                                      | 2,778 (4.7)                                  |
| Endocrine, nutritional and metabolic diseases (IV)                                       | 12,236 (4.2)                                                     | 5,688 (2.7)                                    | 3,028 (4.0)                                                      | 1,543 (2.6)                                  |
| Mental and behavioural disorders (V)                                                     | 10,187 (3.5)                                                     | 4,202 (2.0)                                    | 8,608 (11.5)                                                     | 4,754 (8.0)                                  |
| Diseases of the nervous system (VI)                                                      | 6,983 (2.4)                                                      | 4,583 (2.2)                                    | 1,655 (2.2)                                                      | 1,264 (2.1)                                  |
| Diseases of the eye, adnexa, ear and mastoid process (VII&VIII)                          | 836 (0.3)                                                        | 1,114 (0.5)                                    | 242 (0.3)                                                        | 385 (0.6)                                    |
| Diseases of the circulatory system (IX)                                                  | 50,029 (17.1)                                                    | 45,727 (21.6)                                  | 9,415 (12.6)                                                     | 9,660 (16.2)                                 |
| Diseases of the respiratory system (X)                                                   | 35,749 (12.2)                                                    | 20,607 (9.7)                                   | 8,679 (11.6)                                                     | 5,353 (9.0)                                  |
| Diseases of the digestive system (XI)                                                    | 41,150 (14.1)                                                    | 34,488 (16.3)                                  | 9,910 (13.2)                                                     | 8,722 (14.6)                                 |
| Diseases of the skin and subcutaneous tissue (XII)                                       | 5,120 (1.8)                                                      | 2,015 (1.0)                                    | 1,653 (2.2)                                                      | 645 (1.1)                                    |
| Diseases of the musculoskeletal system and connective tissue (XIII)                      | 8,113 (2.8)                                                      | 4,757 (2.2)                                    | 1,975 (2.6)                                                      | 1,352 (2.3)                                  |
| Diseases of the genitourinary system (XIV)                                               | 19,100 (6.5)                                                     | 10,740 (5.1)                                   | 4,695 (6.3)                                                      | 3,563 (6.0)                                  |
| Pregnancy, childbirth and the puerperium (XV)                                            | 5,417 (1.9)                                                      | 6,688 (3.2)                                    | 2,848 (3.8)                                                      | 2,853 (4.8)                                  |
| Certain conditions originating in the perinatal period (XVI)                             | 0 (0.0)                                                          | 1 (0.0)                                        | 2 (0.0)                                                          | 0 (0.0)                                      |
| Congenital malformations, deformations and chromosomal abnormalities (XVII)              | 124 (0.0)                                                        | 110 (0.1)                                      | 44 (0.1)                                                         | 47 (0.1)                                     |
| Symptoms and abnormal clinical and laboratory findings, not otherwise classified (XVIII) | 27,636 (9.5)                                                     | 15,969 (7.5)                                   | 5,523 (7.4)                                                      | 3,374 (5.6)                                  |

Appendix 1, as supplied by authors. Appendix to: Moe J, Wang E, McGregor MJ, et al. Subgroups of people who make frequent emergency department visits in Ontario and Alberta: a retrospective cohort study. *CMAJ Open* 2022. DOI:10.9778/cmajo.20210132. Copyright © 2022 The Author(s) or their employer(s).

To receive this resource in an accessible format, please contact us at [cmaigroup@cmaj.ca](mailto:cmaigroup@cmaj.ca).

|                                                                           |              |               |              |              |
|---------------------------------------------------------------------------|--------------|---------------|--------------|--------------|
| Injury, poisoning and certain other consequences of external causes (XIX) | 27,506 (9.4) | 27,818 (13.1) | 7,904 (10.5) | 9,135 (15.3) |
| Factors influencing health status and contact with health services (XXI)  | 9,944 (3.4)  | 8,122 (3.8)   | 2,770 (3.7)  | 2,560 (4.3)  |
| NA                                                                        | 0 (0.0)      | 1 (0.0)       | 0 (0.0)      | 2 (0.0)      |

Appendix 1, as supplied by authors. Appendix to: Moe J, Wang E, McGregor MJ, et al. Subgroups of people who make frequent emergency department visits in Ontario and Alberta: a retrospective cohort study. *CMAJ Open* 2022. DOI:10.9778/cmajo.20210132. Copyright © 2022 The Author(s) or their employer(s).

To receive this resource in an accessible format, please contact us at [cmaigroup@cmaj.ca](mailto:cmaigroup@cmaj.ca).

**Appendix Table 8: Cluster analysis and Subgroup Characterization Among People Who Make Frequent ED Visits in Ontario, April 1<sup>st</sup>, 2013 to March 31<sup>st</sup>, 2014 (Detailed Diagnostic Codes).**

|                                                                                        | <b>Subgroup 1<br/>(Short Duration)</b> | <b>Subgroup 2<br/>(Older Patients)</b> | <b>Subgroup 3<br/>(Young Mental<br/>Health)</b> | <b>Subgroup 4<br/>(Injury)</b> |
|----------------------------------------------------------------------------------------|----------------------------------------|----------------------------------------|-------------------------------------------------|--------------------------------|
| <b>Number of patients</b>                                                              | 34,116                                 | 74,995                                 | 49,167                                          | 292,704                        |
| <b>Age, median (IQR)</b>                                                               | 49 (32-64)                             | 69 (54-80)                             | 45 (29-63)                                      | 47 (30-65)                     |
| <b>Number of visits to<br/>the ED, median (IQR)</b>                                    | 2 (1-3)                                | 3 (2-4)                                | 6 (4-8)                                         | 2 (1-3)                        |
| <b>Number of discharge<br/>diagnosis mental<br/>illness chapters,<br/>median (IQR)</b> | 0 (0-0)                                | 0 (0-0)                                | 0 (0-1)                                         | 0 (0-0)                        |
| <b>Number of discharge<br/>diagnosis circulatory<br/>chapters, median<br/>(IQR)</b>    | 0 (0-0)                                | 0 (0-1)                                | 0 (0-0)                                         | 0 (0-0)                        |
| <b>Number of discharge<br/>diagnosis respiratory<br/>chapters, median<br/>(IQR)</b>    | 0 (0-0)                                | 1 (0-2)                                | 0 (0-1)                                         | 0 (0-0)                        |
| <b>Number of discharge<br/>diagnosis digestive<br/>chapters, median<br/>(IQR)</b>      | 0 (0-0)                                | 0 (0-0)                                | 0 (0-1)                                         | 0 (0-0)                        |
| <b>Charlson comorbidity<br/>index, median (IQR)</b>                                    | 0 (0-0)                                | 1 (1-1)                                | 0 (0-0)                                         | 0 (0-0)                        |
| <b>Number of different<br/>discharge diagnosis<br/>chapters, median<br/>(IQR)</b>      | 2 (2-2)                                | 3 (2-4)                                | 5 (4-6)                                         | 3 (2-3)                        |
| <b>Number of months in<br/>the year that patients</b>                                  | 1 (1-2)                                | 3 (3-4)                                | 6 (5-7)                                         | 3 (2-3)                        |

Appendix 1, as supplied by authors. Appendix to: Moe J, Wang E, McGregor MJ, et al. Subgroups of people who make frequent emergency department visits in Ontario and Alberta: a retrospective cohort study. *CMAJ Open* 2022. DOI:10.9778/cmajo.20210132. Copyright © 2022 The Author(s) or their employer(s).

To receive this resource in an accessible format, please contact us at [cmaigroup@cmaj.ca](mailto:cmaigroup@cmaj.ca).



visited ED, median (IQR)

Regularity index, median (IQR)                      1 (0.8-1)                      0.9x10<sup>-7</sup> (0.6x10<sup>-7</sup>-6.8x10<sup>-5</sup>)                      1.3x10<sup>-7</sup> (0.9x10<sup>-7</sup>-2.2x10<sup>-7</sup>)                      0.9x10<sup>-7</sup> (0.5x10<sup>-7</sup>-1.2x10<sup>-4</sup>)

Number of patients                      34,116                      74,995                      49,167                      292,704

**Sex**

|                                    |               |               |               |                |
|------------------------------------|---------------|---------------|---------------|----------------|
| Female                             | 16,875 (49.5) | 39,575 (52.8) | 29,136 (59.3) | 166,034 (56.7) |
| Male                               | 17,241 (50.5) | 35,420 (47.2) | 20,030 (40.7) | 126,667 (43.3) |
| Other (transsexual, hermaphrodite) | 0 (0.0)       | 0 (0.0)       | 0 (0.0)       | 1 (0.0)        |
| Undifferentiated                   | 0 (0.0)       | 0 (0.0)       | 1 (0.0)       | 1 (0.0)        |
| NA                                 | 0 (0.0)       | 0 (0.0)       | 0 (0.0)       | 1 (0.0)        |

**Rural/urban, n (%)**

|       |               |               |               |                |
|-------|---------------|---------------|---------------|----------------|
| Rural | 7,361 (21.6)  | 15,945 (21.3) | 10,957 (22.3) | 58,949 (20.1)  |
| Urban | 26,669 (78.2) | 58,923 (78.6) | 37,485 (76.2) | 232,647 (79.5) |
| NA    | 86 (0.3)      | 127 (0.2)     | 725 (1.5)     | 1,108 (0.4)    |

Number of ED visits                      113,990                      386,011                      563,397                      1,187,131

**Top 5, ICD-10 ED diagnosis chapters, n (%)**

|                                                                                          |                                                                                      |                                                                                       |                                                                                           |
|------------------------------------------------------------------------------------------|--------------------------------------------------------------------------------------|---------------------------------------------------------------------------------------|-------------------------------------------------------------------------------------------|
| Factors influencing health status and contract with health services (XXI), 24,795 (21.8) | Diseases of the respiratory system (X), 77,541 (20.1)                                | Symptoms, signs and abnormal clinical and laboratory findings (XVIII), 123,315 (21.9) | Symptoms, signs and abnormal clinical and laboratory findings (XVIII), 264,031 (22.2)     |
| Symptoms, signs and abnormal clinical and laboratory findings (XVIII), 19,285 (16.9)     | Symptoms, signs and abnormal clinical and laboratory findings (XVIII), 73,106 (18.9) | Mental and behavioral disorders (V), 65,626 (11.6)                                    | Injury, poisoning and certain other consequences of external causes (XIX), 210,374 (17.7) |
| Injury, poisoning and certain other consequences of external causes (XIX),               | Diseases of the circulatory system (IX), 58,144 (15.1)                               | Factors influencing health status and contract with health services (XXI),            | Factors influencing health status and contract with health services (XXI),                |

Appendix 1, as supplied by authors. Appendix to: Moe J, Wang E, McGregor MJ, et al. Subgroups of people who make frequent emergency department visits in Ontario and Alberta: a retrospective cohort study. *CMAJ Open* 2022. DOI:10.9778/cmajo.20210132. Copyright © 2022 The Author(s) or their employer(s).

To receive this resource in an accessible format, please contact us at [cmaigroup@cmaj.ca](mailto:cmaigroup@cmaj.ca).

|    |                                                                 |                                                                                         |                                                                                          |                                                                                   |
|----|-----------------------------------------------------------------|-----------------------------------------------------------------------------------------|------------------------------------------------------------------------------------------|-----------------------------------------------------------------------------------|
|    | 15,663 (13.7)                                                   |                                                                                         | 63,746 (11.3)                                                                            | 115,539 (9.7)                                                                     |
|    | Diseases of the skin and subcutaneous tissue (XII), 9,765 (8.6) | Injury, poisoning and certain other consequences of external causes (XIX), 32,607 (8.4) | Injury, poisoning and certain other consequences of external causes (XIX), 61,927 (11.0) | Diseases of the musculoskeletal system and connective tissue (XIII), 90,508 (7.6) |
|    | Diseases of the digestive system (XI), 7,764 (6.8)              | Factors influencing health status and contact with health services (XXI), 22,428 (5.8)  | Diseases of the digestive system (XI), 47,698 (8.5)                                      | Diseases of the genitourinary system (XIV), 86,594 (7.3)                          |
| NA | (0.0)                                                           | (0.0)                                                                                   | (0.0)                                                                                    | (0.0)                                                                             |

### Top 5 ICD-10 ED primary diagnosis, n (%)

|                                                           |                                                                 |                                                                   |                                                                                                |                                                           |
|-----------------------------------------------------------|-----------------------------------------------------------------|-------------------------------------------------------------------|------------------------------------------------------------------------------------------------|-----------------------------------------------------------|
|                                                           | Other chemotherapy (Z512), 13,082 (11.5)                        | COPD, with acute exacerbation (J441), 23,782 (4.2)                | Other and unspecified abdominal pain (R104), 23,782 (4.2)                                      | Other and unspecified abdominal pain (R104), 46,055 (3.9) |
|                                                           | Other and unspecified abdominal pain (R104), 3,944 (3.5)        | Asthma, unspecified (J4590), 15,192 (2.7)                         | Other chemotherapy (Z512), 15,192 (2.7)                                                        | Urinary tract infection (N390), 37,335 (3.1)              |
|                                                           | Attention to surgical dressings and sutures (Z480), 3,151 (2.8) | Pneumonia, unspecified (J189), 15,025 (2.7)                       | Urinary tract infection (N390), 15,025 (2.7)                                                   | Chest pain, unspecified (R074), 31,801 (2.7)              |
|                                                           | Cellulitis of lower limb (L0311), 3,107 (2.7)                   | Bronchitis, not specified as acute or chronic (J40), 12,552 (2.2) | Chest pain, unspecified (R074), 12,552 (2.2)                                                   | Other chemotherapy (Z512), 26,497 (2.2)                   |
|                                                           | Cellulitis of upper limb (L0310), 2,021 (1.8)                   | Congestive heart failure (I500), 10,268 (1.8)                     | Mental and behavioral disorders due to use of alcohol, acute intoxication (F100), 10,268 (1.8) | Cellulitis of lower limb (L0311), 16,941 (1.4)            |
| NA                                                        | (0.0)                                                           | (0.0)                                                             | (0.0)                                                                                          | (0.0)                                                     |
| Discharged                                                | 92,928 (81.5)                                                   | 266,750 (69.1)                                                    | 455,419 (80.8)                                                                                 | 1,003,316 (84.5)                                          |
| Patient left the emergency department at his/her own risk | 4,525 (4.0)                                                     | 8,323 (2.2)                                                       | 32,546 (5.8)                                                                                   | 43,506 (3.7)                                              |

Appendix 1, as supplied by authors. Appendix to: Moe J, Wang E, McGregor MJ, et al. Subgroups of people who make frequent emergency department visits in Ontario and Alberta: a retrospective cohort study. *CMAJ Open* 2022. DOI:10.9778/cmajo.20210132. Copyright © 2022 The Author(s) or their employer(s).

To receive this resource in an accessible format, please contact us at [cmaigroup@cmaj.ca](mailto:cmaigroup@cmaj.ca).

|                                 |             |                |               |                |
|---------------------------------|-------------|----------------|---------------|----------------|
| Admitted to in-patient facility | 9,544 (8.4) | 101,667 (26.3) | 64,298 (11.4) | 121,653 (10.2) |
| Transferred to another facility | 6,952 (6.1) | 8,706 (2.3)    | 10,989 (2.0)  | 18,268 (1.5)   |
| Death                           | 41 (0.0)    | 565 (0.1)      | 145 (0.0)     | 388 (0.0)      |
| NA                              | (0.0)       | (0.0)          | (0.0)         | (0.0)          |

|                                                              | <b>Subgroup 1<br/>(Short Duration,<br/>N=34,116)</b>                                    | <b>Subgroup 2<br/>(Older Patients,<br/>N=74,995)</b>                                                         | <b>Subgroup 3<br/>(Young Mental<br/>Health, N=49,167)</b>                                                     | <b>Subgroup 4<br/>(Injury, N=292,704)</b>                                                                      |
|--------------------------------------------------------------|-----------------------------------------------------------------------------------------|--------------------------------------------------------------------------------------------------------------|---------------------------------------------------------------------------------------------------------------|----------------------------------------------------------------------------------------------------------------|
| <b>Number of patients with at least one admission, n (%)</b> | <b>6,825 (20.0)</b>                                                                     | <b>45,430 (60.6)</b>                                                                                         | <b>21,745 (44.2)</b>                                                                                          | <b>72,084 (24.6)</b>                                                                                           |
| <b>Number of admissions</b>                                  | <b>8,078</b>                                                                            | <b>100,924</b>                                                                                               | <b>57,359</b>                                                                                                 | <b>110,157</b>                                                                                                 |
| <b>Number of admissions per patient, median (IQR)</b>        | 2 (1-3)                                                                                 | 1 (1-2)                                                                                                      | 2 (1-3)                                                                                                       | 1 (1-1)                                                                                                        |
| <b>Median length of stay in days, median (IQR)</b>           | 3 (1-6)                                                                                 | 4 (2-8)                                                                                                      | 4 (2-8)                                                                                                       | 5 (3-10)                                                                                                       |
| <b>Top 5 ICD-10 primary diagnosis chapters, n (%)</b>        |                                                                                         |                                                                                                              |                                                                                                               |                                                                                                                |
|                                                              | Diseases of the digestive system (XI), 1,574 (19.5)                                     | Diseases of the circulatory system (IX), 30,001 (29.7)                                                       | Diseases of the digestive system (XI), 12,229 (21.3)                                                          | Diseases of the digestive system (XI), 19,370 (17.6)                                                           |
|                                                              | Injury, poisoning and certain other consequences of external causes (XIX), 1,351 (16.7) | Diseases of the respiratory system (X), 20,441 (20.3)                                                        | Symptoms, signs and abnormal clinical and laboratory findings, not elsewhere classified (XVIII), 6,901 (12.0) | Injury, poisoning and certain other consequences of external causes (XIX), 14,330 (13.0)                       |
|                                                              | Diseases of the circulatory system (IX), 1,286 (15.9)                                   | Symptoms, signs and abnormal clinical and laboratory findings, not elsewhere classified (XVIII), 7,836 (7.8) | Injury, poisoning and certain other consequences of external causes (XIX), 5,604 (9.8)                        | Symptoms, signs and abnormal clinical and laboratory findings, not elsewhere classified (XVIII), 12,961 (11.8) |
|                                                              | Symptoms, signs and abnormal clinical and laboratory findings, not                      | Neoplasms and diseases of the blood (C &D),                                                                  | Diseases of the circulatory system (IX),                                                                      | Diseases of the circulatory system (IX),                                                                       |

Appendix 1, as supplied by authors. Appendix to: Moe J, Wang E, McGregor MJ, et al. Subgroups of people who make frequent emergency department visits in Ontario and Alberta: a retrospective cohort study. *CMAJ Open* 2022. DOI:10.9778/cmajo.20210132. Copyright © 2022 The Author(s) or their employer(s).

To receive this resource in an accessible format, please contact us at [cmaigroup@cmaj.ca](mailto:cmaigroup@cmaj.ca).

|                                                                                                                             |                                                       |                                                      |                                                           |                                                         |
|-----------------------------------------------------------------------------------------------------------------------------|-------------------------------------------------------|------------------------------------------------------|-----------------------------------------------------------|---------------------------------------------------------|
|                                                                                                                             | elsewhere classified (XVIII), 599 (7.4)               | 7,459 (7.4)                                          | 4,707 (8.2)                                               | 12,934 (11.7)                                           |
|                                                                                                                             | Diseases of the genitourinary system (XIV), 560 (6.9) | Diseases of the digestive system (XI), 6,693 (6.6)   | Diseases of the genitourinary system (XIV), 4,615 (8.0)   | Diseases of the genitourinary system (XIV), 9,034 (8.2) |
| NA                                                                                                                          | 0 (0.0)                                               | 0 (0.0)                                              | 0 (0.0)                                                   | 0 (0.0)                                                 |
| No                                                                                                                          | 8,027 (99.4)                                          | 100,643 (99.7)                                       | 55,351 (96.5)                                             | 108,918 (98.9)                                          |
| Yes                                                                                                                         | 51 (0.6)                                              | 281 (0.3)                                            | 2,008 (3.5)                                               | 1,239 (1.1)                                             |
| NA                                                                                                                          | 0 (0.0)                                               | 0 (0.0)                                              | 0 (0.0)                                                   | 0 (0.0)                                                 |
|                                                                                                                             | <b>Subgroup 1<br/>(Short Duration,<br/>N=34,116)</b>  | <b>Subgroup 2<br/>(Older Patients,<br/>N=74,995)</b> | <b>Subgroup 3<br/>(Young Mental<br/>Health, N=49,167)</b> | <b>Subgroup 4<br/>(Injury, N=292,704)</b>               |
| <b>Number of patients with at least one mental health admission, n (%)</b>                                                  | <b>1,103 (3.2)</b>                                    | <b>4,955 (6.6)</b>                                   | <b>10,048 (20.4)</b>                                      | <b>20,031 (6.8)</b>                                     |
| <b>Number of mental health admissions</b>                                                                                   | 1,926                                                 | 8,467                                                | 40,406                                                    | 45,035                                                  |
| DAD                                                                                                                         | 363 (18.8)                                            | 4,365 (51.6)                                         | 8,555 (21.2)                                              | 9,482 (21.1)                                            |
| OMHRS                                                                                                                       | 1,563 (81.2)                                          | 4,102 (48.4)                                         | 31,851 (78.8)                                             | 35,553 (78.9)                                           |
| <b>Homelessness status among patients with at least one mental health admission, n (%)</b>                                  | 113 (5.9)                                             | 214 (2.5)                                            | 3,874 (9.6)                                               | 2,264 (5.0)                                             |
| <b>Age among patients with at least one mental health admission, median (IQR)</b>                                           | 45 (29-58)                                            | 72 (56-83)                                           | 42 (28-56)                                                | 43 (28-60)                                              |
| <b>Number of mental health admissions per person among patients with at least one mental health admission, median (IQR)</b> | 1 (1-2)                                               | 1 (1-2)                                              | 2 (1-5)                                                   | 1 (1-3)                                                 |

Appendix 1, as supplied by authors. Appendix to: Moe J, Wang E, McGregor MJ, et al. Subgroups of people who make frequent emergency department visits in Ontario and Alberta: a retrospective cohort study. *CMAJ Open* 2022. DOI:10.9778/cmajo.20210132. Copyright © 2022 The Author(s) or their employer(s).

To receive this resource in an accessible format, please contact us at [cmaigroup@cmai.ca](mailto:cmaigroup@cmai.ca).

|                                                                            |              |              |               |               |
|----------------------------------------------------------------------------|--------------|--------------|---------------|---------------|
| <b>Involuntary admissions among mental health admissions, n (%)</b>        | 308 (16)     | 816 (9.6)    | 6,172 (15.3)  | 6,877 (15.3)  |
| <b>Length of stay in days among mental health admissions, median (IQR)</b> | 9 (3-21)     | 9 (3-20)     | 5 (2-13)      | 7 (3-17)      |
| Discharged home                                                            | 1,588 (82.5) | 6,274 (74.1) | 32,718 (81.0) | 37,605 (83.5) |
| Transferred                                                                | 210 (10.9)   | 1,780 (21.0) | 3,184 (7.9)   | 4,338 (9.6)   |
| Died                                                                       | 3 (0.2)      | 95 (1.1)     | 35 (0.1)      | 121 (0.3)     |
| Left against medical advice                                                | 39 (2.0)     | 114 (1.3)    | 1,427 (3.5)   | 831 (1.8)     |
| Other (cadaveric donor, homeless, and other)                               | 86 (4.5)     | 204 (2.4)    | 3,042 (7.5)   | 2,140 (4.8)   |
| NA                                                                         | 0 (0.0)      | 0 (0.0)      | 0 (0.0)       | 0 (0.0)       |
| Mood disorders                                                             | 629 (32.7)   | 1,967 (23.2) | 10,473 (25.9) | 14,071 (31.2) |
| Schizophrenic and psychotic disorders                                      | 524 (27.2)   | 1,291 (15.2) | 9,852 (24.4)  | 11,582 (25.7) |
| Substance related disorders                                                | 337 (17.5)   | 1,150 (13.6) | 10,686 (26.4) | 8,766 (19.5)  |
| Organic disorders                                                          | 177 (9.2)    | 3,097 (36.6) | 1,379 (3.4)   | 3,606 (8.0)   |
| Other mental health disorders                                              | 137 (7.1)    | 423 (5.0)    | 3,248 (8.0)   | 3,478 (7.7)   |
| Anxiety disorders                                                          | 57 (3.0)     | 344 (4.1)    | 1,582 (3.9)   | 1,772 (3.9)   |
| Personality disorders                                                      | 51 (2.6)     | 162 (1.9)    | 2,964 (7.3)   | 1,517 (3.4)   |
| Non-mental health disorders                                                | 11 (0.6)     | 30 (0.4)     | 177 (0.4)     | 183 (0.4)     |
| Unknown Disorders                                                          | 3 (0.2)      | 3 (0.0)      | 45 (0.1)      | 60 (0.1)      |
| NA                                                                         | 0 (0.0)      | 0 (0.0)      | 0 (0.0)       | 0 (0.0)       |

**Footnote:** Emergency department (ED), National Ambulatory Care Reporting System metadata (NACRS), Interquartile range (IQR), Chronic obstructive pulmonary disease (COPD), International Statistical Classification of Diseases and Related Health Problems (ICD-10-CA), Discharge Abstract Database (DAD), Hospital Mental Health Database Metadata (HMHDB), Ontario Mental Health Reporting System (OMHRS).

Appendix 1, as supplied by authors. Appendix to: Moe J, Wang E, McGregor MJ, et al. Subgroups of people who make frequent emergency department visits in Ontario and Alberta: a retrospective cohort study. *CMAJ Open* 2022. DOI:10.9778/cmajo.20210132. Copyright © 2022 The Author(s) or their employer(s).

To receive this resource in an accessible format, please contact us at [cmaigroup@cmaj.ca](mailto:cmaigroup@cmaj.ca).

**Appendix Table 9: Cluster Analysis and Subgroup Characterization Among People Who Made Frequent ED Visits in Alberta, April 1<sup>st</sup> 2013 to March 31<sup>st</sup> 2014 (Detailed Diagnostic Codes).**

|                                                                            | <b>Subgroup 1<br/>(Short Duration)</b> | <b>Subgroup 2<br/>(Older Patients)</b> | <b>Subgroup 3<br/>(Young Mental<br/>Health)</b> | <b>Subgroup 4<br/>(Injury)</b> |
|----------------------------------------------------------------------------|----------------------------------------|----------------------------------------|-------------------------------------------------|--------------------------------|
| <i>Subgroup Characteristics (Clustering Variables)</i>                     |                                        |                                        |                                                 |                                |
| <b>Number of patients</b>                                                  | 4,301                                  | 18,776                                 | 12,827                                          | 67,722                         |
| <b>Age, median (IQR)</b>                                                   | 44 (31-58)                             | 64 (48-78)                             | 40 (28-55)                                      | 40 (27-58)                     |
| <b>Number of visits to the ED, median (IQR)</b>                            | 3 (2-4)                                | 3 (2-5)                                | 7 (4-11)                                        | 3 (2-4)                        |
| <b>Number of discharge diagnosis mental illness chapters, median (IQR)</b> | 0 (0-0)                                | 0 (0-0)                                | 0 (0-2)                                         | 0 (0-0)                        |
| <b>Number of discharge diagnosis circulatory chapters, median (IQR)</b>    | 0 (0-0)                                | 0 (0-1)                                | 0 (0-0)                                         | 0 (0-0)                        |
| <b>Number of discharge diagnosis respiratory chapters, median (IQR)</b>    | 0 (0-0)                                | 1 (0-2)                                | 0 (0-1)                                         | 0 (0-0)                        |
| <b>Number of discharge diagnosis digestive chapters, median (IQR)</b>      | 0 (0-0)                                | 0 (0-0)                                | 1 (0-2)                                         | 0 (0-0)                        |
| <b>Charlson comorbidity index, median (IQR)</b>                            | 0 (0-0)                                | 1 (1-1)                                | 0 (0-0)                                         | 0 (0-0)                        |
| <b>Number of different discharge diagnosis chapters, median (IQR)</b>      | 2 (2-2)                                | 4 (3-5)                                | 5 (5-6)                                         | 3 (2-4)                        |
| <b>Number of months in the year that patients</b>                          | 1 (1-1)                                | 4 (3-5)                                | 7 (6-8)                                         | 3 (2-4)                        |

Appendix 1, as supplied by authors. Appendix to: Moe J, Wang E, McGregor MJ, et al. Subgroups of people who make frequent emergency department visits in Ontario and Alberta: a retrospective cohort study. *CMAJ Open* 2022. DOI:10.9778/cmajo.20210132. Copyright © 2022 The Author(s) or their employer(s).

To receive this resource in an accessible format, please contact us at [cmaigroup@cmai.ca](mailto:cmaigroup@cmai.ca).

visited ED, median (IQR)

Regularity index, median (IQR)                      1 (0.8-1)                       $1 \times 10^{-7}$  ( $0.7 \times 10^{-7}$ - $3.8 \times 10^{-5}$ )                       $1.6 \times 10^{-7}$  ( $1.2 \times 10^{-7}$ - $2.6 \times 10^{-7}$ )                       $0.9 \times 10^{-7}$  ( $0.6 \times 10^{-7}$ - $8.6 \times 10^{-5}$ )

*Patient Characteristics (NACRS)*

**Number of patients**                      **4,301**                      **18,776**                      **12,827**                      **67,722**

**Sex**

Female                      1,868 (43.4)                      9,744 (51.9)                      7,766 (60.5)                      37,888 (55.9)  
 Male                      2,433 (56.6)                      9,032 (48.1)                      5,060 (39.4)                      29,833 (44.1)  
 NA                      0 (0.0)                      0 (0.0)                      1 (0.0)                      1 (0.0)

**Rural/urban, n (%)**

Rural                      1,428 (33.2)                      6,720 (35.8)                      5,526 (43.1)                      22,378 (33.0)  
 Urban                      2,850 (66.3)                      11,921 (63.5)                      6,846 (53.4)                      44,610 (65.9)  
 NA                      23 (0.5)                      135 (0.7)                      455 (3.5)                      734 (1.1)

*ED Visit Characteristics*

**Number of ED visits**                      **499,395**                      **1,587,307**                      **139,770**                      **780,967**

**Top 5, ICD-10 ED diagnosis chapters, n (%)**

|                                                                                          |                                                                                          |                                                                                          |                                                                                          |
|------------------------------------------------------------------------------------------|------------------------------------------------------------------------------------------|------------------------------------------------------------------------------------------|------------------------------------------------------------------------------------------|
| Factors influencing health status and contract with health services (XXI), 16,010 (62.2) | Diseases of the respiratory system (X), 25,965 (19.2)                                    | Factors influencing health status and contract with health services (XXI), 55,758 (27.1) | Factors influencing health status and contract with health services (XXI), 89,826 (23.3) |
| Diseases of the skin and subcutaneous tissue (XII), 1,878 (7.3)                          | Factors influencing health status and contract with health services (XXI), 20,731 (15.4) | Symptoms, signs and abnormal clinical and laboratory findings (XVIII), 29,857 (14.5)     | Injury, poisoning and certain other consequences of external causes (XIX), 61,323 (15.9) |
| Symptoms, signs and abnormal clinical and laboratory findings (XVIII), 1,503 (5.8)       | Symptoms, signs and abnormal clinical and laboratory findings (XVIII), 20,646 (15.3)     | Injury, poisoning and certain other consequences of external causes (XIX), 21,016 (10.2) | Symptoms, signs and abnormal clinical and laboratory findings (XVIII), 59,806 (15.5)     |
| Injury, poisoning and certain other                                                      | Diseases of the circulatory system (IX),                                                 | Mental and behavioural disorders (V),                                                    | Diseases of the musculoskeletal system and                                               |

Appendix 1, as supplied by authors. Appendix to: Moe J, Wang E, McGregor MJ, et al. Subgroups of people who make frequent emergency department visits in Ontario and Alberta: a retrospective cohort study. *CMAJ Open* 2022. DOI:10.9778/cmajo.20210132. Copyright © 2022 The Author(s) or their employer(s).

To receive this resource in an accessible format, please contact us at [cmaigroup@cmai.ca](mailto:cmaigroup@cmai.ca).

|                                                           |                                                                 |                                                                                         |                                                                                               |                                                                  |
|-----------------------------------------------------------|-----------------------------------------------------------------|-----------------------------------------------------------------------------------------|-----------------------------------------------------------------------------------------------|------------------------------------------------------------------|
|                                                           | consequences of external causes (XIX), 1,485 (5.8)              | 14,914 (11.1)                                                                           | 20,583 (10.0)                                                                                 | connective tissue (XIII), 24,335 (6.3)                           |
|                                                           | Diseases of the digestive system (XI), 1,033 (4.0)              | Injury, poisoning and certain other consequences of external causes (XIX), 10,892 (8.1) | Diseases of the digestive system (XI), 15,248 (7.4)                                           | Diseases of the genitourinary system (XIV), 23,424 (6.1)         |
| NA                                                        | 0 (0.0)                                                         | 0 (0.0)                                                                                 | 0 (0.0)                                                                                       | 0 (0.0)                                                          |
| <b>Top 5 ICD-10 ED primary diagnosis, n (%)</b>           |                                                                 |                                                                                         |                                                                                               |                                                                  |
|                                                           | Other chemotherapy (Z512), 12,356 (48.0)                        | Other chemotherapy (Z512), 9,492 (7.0)                                                  | Other chemotherapy (Z512), 31,466 (15.3)                                                      | Other chemotherapy (Z512), 38,202 (9.9)                          |
|                                                           | Attention to surgical dressings and sutures (Z480), 1,574 (6.1) | COPD, with acute exacerbation (J441), 4,599 (3.4)                                       | Attention to surgical dressings and sutures (Z480), 6,016 (2.9)                               | Attention to surgical dressings and sutures (Z480), 12,771 (3.3) |
|                                                           | Other specified medical care NEC (Z5188), 823 (3.2)             | Bronchitis, not specified as acute or chronic (J40), 4,241 (3.1)                        | Other and unspecified abdominal pain (R104), 5,650 (2.7)                                      | Urinary tract infection (N390), 9,159 (2.4)                      |
|                                                           | Cellulitis of lower limb (L0311), 623 (2.4)                     | Congestive heart failure (I500), 3,919 (2.9)                                            | Urinary tract infection (N390), 4,044 (2.0)                                                   | Other and unspecified abdominal pain (R104), 9,075 (2.4)         |
|                                                           | Periapical abscess without sinus (K047), 372 (1.4)              | Asthma, unspecified (J4590), 3,025 (2.2)                                                | Mental and behavioral disorders due to use of alcohol, acute intoxication (F100), 4,329 (2.1) | Other specified orthopaedic follow-up care (Z478), 8,380 (2.2)   |
| NA                                                        | 0 (0.0)                                                         | 0 (0.0)                                                                                 | 0 (0.0)                                                                                       | 0 (0.0)                                                          |
| <b>Visit disposition, n (%)</b>                           |                                                                 |                                                                                         |                                                                                               |                                                                  |
| Discharged                                                | 23,892 (92.9)                                                   | 102,510 (76.0)                                                                          | 177,626 (86.3)                                                                                | 334,800 (87.0)                                                   |
| Patient left the emergency department at his/her own risk | 409 (1.6)                                                       | 3,306 (2.5)                                                                             | 10,731 (5.2)                                                                                  | 14,663 (3.8)                                                     |
| Admitted to in-patient facility                           | 762 (3.0)                                                       | 24,873 (18.4)                                                                           | 14,082 (6.8)                                                                                  | 27,476 (7.1)                                                     |
| Transferred to another facility                           | 654 (2.5)                                                       | 4,090 (3.0)                                                                             | 3,376 (1.6)                                                                                   | 7,861 (2.0)                                                      |
| Death                                                     | 2 (0.0)                                                         | 119 (0.1)                                                                               | 37 (0.0)                                                                                      | 53 (0.0)                                                         |

Appendix 1, as supplied by authors. Appendix to: Moe J, Wang E, McGregor MJ, et al. Subgroups of people who make frequent emergency department visits in Ontario and Alberta: a retrospective cohort study. *CMAJ Open* 2022. DOI:10.9778/cmajo.20210132. Copyright © 2022 The Author(s) or their employer(s).

To receive this resource in an accessible format, please contact us at [cmaigroup@cmaj.ca](mailto:cmaigroup@cmaj.ca).



NA 0 (0.0) 0 (0.0) 0 (0.0) 0 (0.0)

*Hospitalization Characteristics (DAD)*

|                                                             | <b>Subgroup 1<br/>(Short Duration,<br/>N=4,301)</b>                                   | <b>Subgroup 2<br/>(Older Patients,<br/>N=18,776)</b>                                                         | <b>Subgroup 3<br/>(Young Mental<br/>Health, N=12,827)</b>                                                    | <b>Subgroup 4<br/>(Injury, N=67,722)</b>                                                                     |
|-------------------------------------------------------------|---------------------------------------------------------------------------------------|--------------------------------------------------------------------------------------------------------------|--------------------------------------------------------------------------------------------------------------|--------------------------------------------------------------------------------------------------------------|
| <b>Number of patient with at least one admission, n (%)</b> | <b>603 (14.0)</b>                                                                     | <b>10,926 (58.2)</b>                                                                                         | <b>6,209 (48.4)</b>                                                                                          | <b>18,857 (27.8)</b>                                                                                         |
| <b>Number of admissions</b>                                 | <b>728</b>                                                                            | <b>26,281</b>                                                                                                | <b>15,937</b>                                                                                                | <b>29,826</b>                                                                                                |
| <b>Number of admissions per patient, median (IQR)</b>       | 1 (1-1)                                                                               | 2 (1-3)                                                                                                      | 2 (1-3)                                                                                                      | 1 (1-2)                                                                                                      |
| <b>Median length of stay in days, median (IQR)</b>          | 5 (3-10)                                                                              | 4 (2-8)                                                                                                      | 3 (1-6)                                                                                                      | 4 (2-8)                                                                                                      |
| <b>Top 5 ICD-10 primary diagnosis chapters, n (%)</b>       |                                                                                       |                                                                                                              |                                                                                                              |                                                                                                              |
|                                                             | Diseases of the digestive system (XI), 125 (17.2)                                     | Diseases of the circulatory system (IX), 6,145 (23.4)                                                        | Mental and behavioral disorders (V), 3,522 (22.1)                                                            | Diseases of the digestive system (XI), 4,581 (15.4)                                                          |
|                                                             | Injury, poisoning and certain other consequences of external causes (XIX), 120 (16.5) | Diseases of the respiratory system (X), 5,693 (21.7)                                                         | Diseases of the digestive system (XI), 2,933 (18.4)                                                          | Injury, poisoning and certain other consequences of external causes (XIX), 4,404 (14.8)                      |
|                                                             | Diseases of the genitourinary system (XIV), 73 (10)                                   | Symptoms, signs and abnormal clinical and laboratory findings, not elsewhere classified (XVIII), 2,175 (8.3) | Injury, poisoning and certain other consequences of external causes (XIX), 1,655 (10.4)                      | Mental and behavioral disorders (V), 3,526 (11.8)                                                            |
|                                                             | Pregnancy, childbirth and the puerperium (XV), 71 (9.8)                               | Diseases of the digestive system (XI), 2,033 (7.7)                                                           | Symptoms, signs and abnormal clinical and laboratory findings, not elsewhere classified (XVIII), 1,347 (8.5) | Symptoms, signs and abnormal clinical and laboratory findings, not elsewhere classified (XVIII), 2,647 (8.9) |
|                                                             | Diseases of the circulatory system (IX), 57 (7.8)                                     | Endocrine, nutritional and                                                                                   | Diseases of the respiratory system (X),                                                                      | Diseases of the genitourinary system (XIV),                                                                  |

Appendix 1, as supplied by authors. Appendix to: Moe J, Wang E, McGregor MJ, et al. Subgroups of people who make frequent emergency department visits in Ontario and Alberta: a retrospective cohort study. *CMAJ Open* 2022. DOI:10.9778/cmajo.20210132. Copyright © 2022 The Author(s) or their employer(s).

To receive this resource in an accessible format, please contact us at [cmaigroup@cmaj.ca](mailto:cmaigroup@cmaj.ca).

|                                             |            |                                            |               |               |
|---------------------------------------------|------------|--------------------------------------------|---------------|---------------|
|                                             |            | metabolic diseases<br>(IV),<br>1,558 (5.9) | 906 (5.7)     | 2,405 (8.1)   |
| NA                                          | 0 (0.0)    | 0 (0.0)                                    | 0 (0.0)       | 0 (0.0)       |
| <b>All Alcohol-related diagnoses, n (%)</b> |            |                                            |               |               |
| No                                          | 726 (99.7) | 26,117 (99.4)                              | 14,479 (90.9) | 28,939 (97.0) |
| Yes                                         | 2 (0.3)    | 164 (0.6)                                  | 1,458 (9.1)   | 887 (3.0)     |
| NA                                          | 0 (0.0)    | 0 (0.0)                                    | 0 (0.0)       | 0 (0.0)       |

---

*Mental Health Hospitalizations (HMHDB)*

---

|                                                                                                                             | <b>Subgroup 1<br/>(Short Duration,<br/>N=4,301)</b> | <b>Subgroup 2<br/>(Older Patients,<br/>N=18,776)</b> | <b>Subgroup 3<br/>(Young Mental<br/>Health, N=12,827)</b> | <b>Subgroup 4<br/>(Injury, N=67,722)</b> |
|-----------------------------------------------------------------------------------------------------------------------------|-----------------------------------------------------|------------------------------------------------------|-----------------------------------------------------------|------------------------------------------|
| <b>Number of patients with at least one mental health admission, n (%)</b>                                                  | <b>58 (1.3)</b>                                     | <b>1,399 (7.5)</b>                                   | <b>2,842 (22.2)</b>                                       | <b>4,522 (6.7)</b>                       |
| <b>Number of mental health admissions</b>                                                                                   | 85                                                  | 2,400                                                | 10,065                                                    | 9,439                                    |
| <b>Data source among mental health admissions, n (%)</b>                                                                    |                                                     |                                                      |                                                           |                                          |
| DAD                                                                                                                         | 85 (100.0)                                          | 2,400 (100.0)                                        | 10,065 (100.0)                                            | 9,439 (100.0)                            |
| OMHRS                                                                                                                       | 0 (0.0)                                             | 0 (0.0)                                              | 0 (0.0)                                                   | 0 (0.0)                                  |
| <b>Homelessness status among patients with at least one mental health admission, n (%)</b>                                  | 3 (5.2)                                             | 34 (2.4)                                             | 283 (10.0)                                                | 209 (4.6)                                |
| <b>Age among patients with at least one mental health admission, median (IQR)</b>                                           | 35 (25-55)                                          | 68 (52-82)                                           | 39 (29-52)                                                | 41 (28-57)                               |
| <b>Number of mental health admissions per person among patients with at least one mental health admission, median (IQR)</b> | 1 (1-2)                                             | 1 (1-2)                                              | 2 (1-4)                                                   | 1 (1-2)                                  |

Appendix 1, as supplied by authors. Appendix to: Moe J, Wang E, McGregor MJ, et al. Subgroups of people who make frequent emergency department visits in Ontario and Alberta: a retrospective cohort study. *CMAJ Open* 2022. DOI:10.9778/cmajo.20210132. Copyright © 2022 The Author(s) or their employer(s).

To receive this resource in an accessible format, please contact us at [cmaigroup@cmaj.ca](mailto:cmaigroup@cmaj.ca).

|                                                                            |           |              |              |              |
|----------------------------------------------------------------------------|-----------|--------------|--------------|--------------|
| <b>Involuntary admissions among mental health admissions, n (%)</b>        | NA        | NA           | NA           | NA           |
| <b>Length of stay in days among mental health admissions, median (IQR)</b> | 4 (2-21)  | 8 (3-23)     | 4 (2-10)     | 6 (2-15)     |
| <b>Discharge disposition among mental health admissions, n (%)</b>         |           |              |              |              |
| Discharged home                                                            | 69 (81.2) | 1,792 (74.7) | 7,936 (78.8) | 7,579 (80.3) |
| Transferred                                                                | 13 (15.3) | 428 (17.8)   | 822 (8.2)    | 1,039 (11.0) |
| Died                                                                       | 0 (0)     | 29 (1.2)     | 5 (0.0)      | 15 (0.2)     |
| Left against medical advice                                                | 3 (3.5)   | 151 (6.3)    | 1,302 (12.9) | 806 (8.5)    |
| Other (cadaveric donor, homeless, and other)                               | 0 (0.0)   | 0 (0.0)      | 0 (0.0)      | 0 (0.0)      |
| NA                                                                         | 0 (0.0)   | 0 (0.0)      | 0 (0.0)      | 0 (0.0)      |
| <b>Diagnosis category among mental health admissions, n (%)</b>            |           |              |              |              |
| Mood disorders                                                             | 18 (21.2) | 433 (18)     | 1,629 (16.2) | 2,137 (22.6) |
| Schizophrenic and psychotic disorders                                      | 19 (22.4) | 288 (12)     | 1,350 (13.4) | 1,555 (16.5) |
| Substance related disorders                                                | 20 (23.5) | 536 (22.3)   | 4,583 (45.5) | 3,236 (34.3) |
| Organic disorders                                                          | 9 (10.6)  | 739 (30.8)   | 252 (2.5)    | 587 (6.2)    |
| Other mental health disorders                                              | 12 (14.1) | 210 (8.8)    | 1,110 (11.0) | 1,144 (12.1) |
| Anxiety disorders                                                          | 4 (4.7)   | 146 (6.1)    | 407 (4.0)    | 421 (4.5)    |
| Personality disorders                                                      | 1 (1.2)   | 43 (1.8)     | 708 (7.0)    | 322 (3.4)    |
| Non-mental health disorders                                                | 2 (2.4)   | 5 (0.2)      | 26 (0.3)     | 37 (0.4)     |
| NA                                                                         | 0 (0.0)   | 0 (0.0)      | 0 (0.0)      | 0 (0.0)      |

**Footnote:** Emergency department (ED), National Ambulatory Care Reporting System metadata (NACRS), Interquartile range (IQR), Chronic obstructive pulmonary disease (COPD), International Statistical Classification of Diseases and Related Health Problems (ICD-10-CA), Discharge Abstract Database (DAD), Hospital Mental Health Database Metadata (HMHDB), Ontario Mental Health Reporting System (OMHRS).

Appendix 1, as supplied by authors. Appendix to: Moe J, Wang E, McGregor MJ, et al. Subgroups of people who make frequent emergency department visits in Ontario and Alberta: a retrospective cohort study. *CMAJ Open* 2022. DOI:10.9778/cmajo.20210132. Copyright © 2022 The Author(s) or their employer(s).

To receive this resource in an accessible format, please contact us at [cmaigroup@cmaj.ca](mailto:cmaigroup@cmaj.ca).

**Appendix Table 10: Kolmogorov-Smirnov test of normality for continuous variables**

| <b>Variables</b>                                      | <b>Statistic</b> | <b>P value</b> |
|-------------------------------------------------------|------------------|----------------|
| <b>NACRS</b>                                          |                  |                |
| Age                                                   | 0.08             | <0.001         |
| Number of visits to the ED                            | 0.23             | <0.001         |
| Number of discharge diagnosis mental illness chapters | 0.23             | <0.001         |
| Number of discharge diagnosis circulatory chapters    | 0.50             | <0.001         |
| Number of discharge diagnosis respiratory chapters    | 0.45             | <0.001         |
| Number of discharge diagnosis digestive chapters      | 0.48             | <0.001         |
| Charlson comorbidity index                            | 0.41             | <0.001         |
| Number of different discharge diagnosis chapters      | 0.44             | <0.001         |
| Number of months in the year that patients visited ED | 0.49             | <0.001         |
| Regularity index                                      | 0.08             | <0.001         |
|                                                       |                  |                |
| <b>DAD</b>                                            |                  |                |
| Number of admissions                                  | 0.27             | <0.001         |
| Length of stay                                        | 0.28             | <0.001         |
|                                                       |                  |                |
| <b>HMHDB</b>                                          |                  |                |
| Number of mental health admissions                    | 0.32             | <0.001         |
| Length of stay                                        | 0.42             | <0.001         |

**Footnote:** Emergency department (ED), National Ambulatory Care Reporting System metadata (NACRS), Discharge Abstract Database (DAD), Hospital Mental Health Database Metadata (HMHDB).

Appendix 1, as supplied by authors. Appendix to: Moe J, Wang E, McGregor MJ, et al. Subgroups of people who make frequent emergency department visits in Ontario and Alberta: a retrospective cohort study. *CMAJ Open* 2022. DOI:10.9778/cmajo.20210132. Copyright © 2022 The Author(s) or their employer(s).

To receive this resource in an accessible format, please contact us at [cmaigroup@cmaj.ca](mailto:cmaigroup@cmaj.ca).
